# Supplementary material for: Genomic richness enables worldwide invasive success
Source: Research Square preprint supplement (doi:10.21203/rs.3.rs-3902873/v1), 2024-02-28
Supplement: Supplementary file 1 [file 789147dd8c9dc62872d29f8a.docx]

**Genomic richness enables worldwide invasive success**

Carles Galià-Camps 1,2,*, Tilman Schell 3,4, Cinta Pegueroles 1,2, Damian Baranski 3,4, Alex Ben Hamadou 3,4, Xavier Turon 5,+, Marta Pascual 1,2,+, Carola Greve 3,4,+, Carlos Carreras 1,2,+.

1. *Departament de Genètica, Microbiologia i Estadística, Universitat de Barcelona, Avinguda Diagonal 643, 08028 Barcelona, Spain.*

2. Institut de Recerca de la Biodiversitat (IRBio), Universitat de Barcelona (UB)

3. *LOEWE Centre for Translational Biodiversity Genomics (LOEWE-TBG), Senckenberganlage 25, 60325 Frankfurt am Main, Germany.*

4. *Senckenberg Forschungsinstitut und Naturmuseum, Senckenberganlage 25, 60325 Frankfurt am Main, Germany*

5. *Centre d'Estudis Avançats de Blanes (CEAB, CSIC), Accés Cala St. Francesc 14, 17300 Blanes, Girona, Spain.*

*: Corresponding author. cgaliacamps@gmail.com

+: These authors jointly supervised this work

**SUPPLEMENTARY INFORMATION 1**

The genome assembly obtained for *Styela plicata* is one of the highest quality in terms of assembly size and NG50 in comparison to other tunicate assemblies (Supplementary Table I1.1). The total length of the final assembly was 419.2 Mb, close to the 430 Mb obtained by flow cytometry, with a mapping mean coverage of 78X for PacBio Continuous Long Reads and 58X for Illumina Short Reads. The chromosome scaffolding (Fig. 1c) resulted in sixteen large scaffolds (398.9Mb), in line with its previously published karyotype data (n=16) [1](https://paperpile.com/c/FJu5qG/iWjfn). The Omni-C signal supported that most of the chromosomes are metacentric or submetacentric with similar sizes [1](https://paperpile.com/c/FJu5qG/iWjfn) (Fig. 1c). The genome assembly had a QV statistic of 28.99, contained 90% of eukaryotic and 92.3% of metazoan single copy BUSCOs, and the majority of the scaffolds were taxonomically assigned to Chordata (Extended Data Fig. 11a). The genome assembly of *Styela plicata* was rich in repetitive elements (44.99%) including DNA transposons (4.22%), LINEs (4.11%), LTR elements (3.08%) and Small RNA (2.07%) but also a large proportion of unknown repetitive families (35.7%) (Extended Data Fig. 11b, Supplementary Table I1.2). Based on Kimura substitution levels of transposable elements (TE) families, *S. plicata* underwent an ancient TE expansion event mainly driven by unknown repetitive elements, DNA transposons and a few LINEs, as also found in *S. clava* [2](https://paperpile.com/c/FJu5qG/hUQS). Furthemore, LTR played an important role in a more recent TE expansion in both *Styela* species (Extended Data Fig. 11c, [2](https://paperpile.com/c/FJu5qG/hUQS)). After genome annotation, we recovered a total of 37,097 genes, including 19,622 protein coding genes, 7,228 tRNA, 12,293 snoRNA, and 2,451 lncRNA. In parallel, we successfully circularized the individual mitogenome and obtained a unique contig of 14,413 pb with a mean coverage of 381X and a GC content of 29.9%. It was composed of 13 protein coding genes, 2 rRNA organized in tandem and 23 tRNA.

**Supplementary Table I1.1: Genome assembly statistic** comparison of the newly generated assembly of *Styela plicata* with 4 other tunicate species.

| **Assembly** | ***Styela plicata*** | ***Styela clava*** | ***Botryllus schlosseri*** | ***Ciona intestinalis* A *(C. robusta)*** | ***Oikopleura dioica*** |
| --- | --- | --- | --- | --- | --- |
| References | present study | [2](https://paperpile.com/c/FJu5qG/hUQS) | [3](https://paperpile.com/c/FJu5qG/tRcQ) | [4](https://paperpile.com/c/FJu5qG/0fBF) | [5](https://paperpile.com/c/FJu5qG/BEk2) |
| Accession code | ERZ21873893 | GCF_013122585 | GCA_000444245 | GCA_000224145 | GCA_907165135 |
| # contigs | 1077 | 211 | 120139 | 1272 | 19 |
| # contigs (>= 25000 bp) | 155 | 185 | 347 | 287 | 13 |
| # contigs (>= 50000 bp) | 64 | 134 | 0 | 154 | 11 |
| Total length (>= 25000 bp) | 413425667 | 339982718 | 10153958 | 106688020 | 64235295 |
| Total length (>= 50000 bp) | 410266168 | 338155010 | 0 | 101843710 | 64165187 |
| Total length | 419162242 | 340489724 | 577860604 | 115227301 | 64281565 |
| Predicted genome size* | 430000000 | 406780000* | 725000000 | 196000000 | 70000000 |
| GC (%) | 35.44 | 35.28 | 40.55 | 35.67 | 41.05 |
| N50 | 25036768 | 20774986 | 7239 | 5152901 | 16158756 |
| NG50 | 24821409 | 20303285 | 5942 | 81022 | 14533022 |
| N75 | 22624068 | 19273745 | 4493 | 396326 | 12959145 |
| NG75 | 22624068 | 14156018 | 1906 | - | 12959145 |
| L50 | 8 | 8 | 25768 | 9 | 2 |
| LG50 | 9 | 10 | 36991 | 95 | 3 |
| L75 | 13 | 12 | 50617 | 27 | 4 |
| LG75 | 13 | 15 | 86452 | - | 4 |
| # N's per 100 Kbp | 86.58 | 16.39 | 158.25 | 2659.67 | 33.56 |

**Supplementary Table I1.2: Repeated elements number, span and percentage**.

| **TE Level 1** | **TE Level 2** | **TE Level 3** | **Number of elements** | **Length of assembly (bp)** | **Percentage of assembly (%)** |
| --- | --- | --- | --- | --- | --- |
| Retroelements |  | Other  Retroelements | 41055 | 16610312 | 3.96 |
| SINEs | Other SINEs | 802 | 236534 | 0.06 |
| Penelope | 4737 | 953233 | 0.23 |
| LINEs | Other LINEs | 28389 | 9903690 | 2.36 |
| CRE/SLACS | 301 | 87559 | 0.02 |
| L2/CR1/Rex | 17217 | 6135601 | 1.46 |
| R1/LOA/Jockey | 312 | 205488 | 0.05 |
| R2/R4/NeSL | 994 | 685312 | 0.16 |
| L1/CIN4 | 341 | 260671 | 0.06 |
| LTR elements | Other LTR elements | 11864 | 6470088 | 1.54 |
| BEL/Pao | 4380 | 2579526 | 0.62 |
| Ty1/Copia | 567 | 329200 | 0.08 |
| Gypsy/DIRS1 | 6634 | 3533917 | 0.84 |
| DNA transposons | Other DNA-transposons |  | 51358 | 10162718 | 2.42 |
| hobo-Activator |  | 31370 | 5677841 | 1.35 |
| Tc1-IS630-Pogo |  | 1487 | 459486 | 0.11 |
| PiggyBac |  | 245 | 30371 | 0.01 |
| Tourist/Harbinger |  | 5621 | 1388004 | 0.33 |
| Other |  | 5 | 4240 | 0.00 |
| Rolling-circles |  |  | 2763 | 342607 | 0.08 |
| Unknown |  |  | 808048 | 149638405 | 35.70 |
| Total interspersed repeats |  |  |  | 176411435 | 42.09 |
| Small RNA |  |  | 41608 | 8696664 | 2.07 |
| Satellites |  |  | 105 | 14652 | 0.00 |
| Simple repeats |  |  | 44188 | 2612288 | 0.62 |
| Low complexity |  |  | 7655 | 482671 | 0.12 |
| **Total repetitive regions** |  |  |  | **188560317** | **44.99** |

**REFERENCES**

1. [Taylor, K. M. The chromosomes of some lower chordates. *Chromosoma* vol. 21 181–188 Preprint at https://doi.org/](http://paperpile.com/b/FJu5qG/iWjfn)[10.1007/bf00343643](http://dx.doi.org/10.1007/bf00343643) [(1967).](http://paperpile.com/b/FJu5qG/iWjfn)

2. [Wei, J. *et al.* Genomic basis of environmental adaptation in the leathery sea squirt (*Styela clava*). *Mol. Ecol. Resour.* **20**, 1414–1431 (2020).](http://paperpile.com/b/FJu5qG/hUQS)

3. [Voskoboynik, A. *et al.* The genome sequence of the colonial chordate, *Botryllus schlosseri*. *Elife* **2**, e00569 (2013).](http://paperpile.com/b/FJu5qG/tRcQ)

4. [Dehal, P. *et al.* The draft genome of *Ciona intestinalis*: insights into chordate and vertebrate origins. *Science* **298**, 2157–2167 (2002).](http://paperpile.com/b/FJu5qG/0fBF)

5. [Seo, H. C. *et al.* Miniature genome in the marine chordate *Oikopleura dioica*. *Science* **294**, 2506 (2001).](http://paperpile.com/b/FJu5qG/BEk2)
