# Supplementary material for: Genomic richness enables worldwide invasive success
Source: Research Square preprint supplement (doi:10.21203/rs.3.rs-3902873/v1), 2024-02-28
Supplement: Supplementary file 2 [file 85d2a613c018ffe83986be80.xlsx]

## Sheet: Legend
Supplementary spreadsheet 1: Semantically similar GOTerms based on a 0.7 redundancy.

## Sheet: Inversion_Chr2L
TermID	Name	LogSize	Frequency	Uniqueness	Dispensability	Representative
GO:0001662	behavioral fear response	3.09621	0.004135	0.843186	0.628906	null
GO:0042596	fear response	3.17085	0.00491	0.866842	0.909208	1662
GO:0002191	cap-dependent translational initiation	3.22866	0.00561	0.962217	0.172958	null
GO:0002209	behavioral defense response	3.12352	0.004403	0.85178	0.672799	null
GO:0006220	pyrimidine nucleotide metabolic process	5.27559	0.625383	0.934411	0.470515	null
GO:0009218	pyrimidine ribonucleotide metabolic process	5.09025	0.408142	0.926709	0.870198	6220
GO:0006649	phospholipid transfer to membrane	1.88649	0.000252	0.973315	0.553901	null
GO:0007188	adenylate cyclase-modulating G protein-coupled receptor signaling pathway	4.29844	0.065914	0.774292	0.49774	null
GO:0007189	adenylate cyclase-activating G protein-coupled receptor signaling pathway	3.90509	0.026644	0.779284	0.68379	null
GO:0007194	negative regulation of adenylate cyclase activity	3.38489	0.00804	0.8359	0.121829	null
GO:0008628	hormone-mediated apoptotic signaling pathway	1.5563	0.000116	0.808655	0.308868	null
GO:0009138	pyrimidine nucleoside diphosphate metabolic process	4.0505	0.037241	0.948122	0.210035	null
GO:0010745	negative regulation of macrophage derived foam cell differentiation	2.56585	0.001217	0.804344	0.476697	null
GO:0010799	regulation of peptidyl-threonine phosphorylation	3.24748	0.005859	0.82349	0.348589	null
GO:0010801	negative regulation of peptidyl-threonine phosphorylation	2.80482	0.002112	0.793617	0.567295	null
GO:0010874	regulation of cholesterol efflux	3.19005	0.005133	0.757434	0.489818	null
GO:0010875	positive regulation of cholesterol efflux	3.01326	0.003415	0.709767	0.931142	10874
GO:1902994	regulation of phospholipid efflux	2.20952	0.000534	0.776392	0.894418	10874
GO:1902995	positive regulation of phospholipid efflux	2.20952	0.000534	0.728203	0.789417	10874
GO:0010885	regulation of cholesterol storage	2.81425	0.002158	0.782419	0.120172	null
GO:0010887	negative regulation of cholesterol storage	2.48996	0.001021	0.751155	0.855734	10885
GO:0016115	terpenoid catabolic process	3.15473	0.004731	0.989319	0	null
GO:0018272	protein-pyridoxal-5-phosphate linkage via peptidyl-N6-pyridoxal phosphate-L-lysine	1.716	0.000169	0.97669	0.171396	null
GO:0018352	protein-pyridoxal-5-phosphate linkage	2.03342	0.000355	0.975993	0.171131	null
GO:0019264	glycine biosynthetic process from serine	4.22087	0.055132	0.952902	0.196234	null
GO:0030166	proteoglycan biosynthetic process	4.05192	0.037363	0.952807	0.279913	null
GO:0030202	heparin metabolic process	3.56502	0.012175	0.952913	0.436103	null
GO:0031635	adenylate cyclase-inhibiting opioid receptor signaling pathway	1.76343	0.000189	0.820525	0.364012	null
GO:0032276	regulation of gonadotropin secretion	2.50106	0.001048	0.640676	0.64388	null
GO:0032277	negative regulation of gonadotropin secretion	2.24551	0.00058	0.626473	0.92587	32276
GO:0033684	regulation of luteinizing hormone secretion	1.96379	0.000302	0.653408	0.823011	32276
GO:0033685	negative regulation of luteinizing hormone secretion	1.23045	5.3e-05	0.656411	0.844323	32276
GO:0032489	regulation of Cdc42 protein signal transduction	2.51188	0.001074	0.823877	0.115864	null
GO:0032611	interleukin-1 beta production	2.95231	0.000379	0.904386	0.046268	null
GO:0032612	interleukin-1 production	2.0607	0.000379	0.904386	0.835189	32611
GO:0033135	regulation of peptidyl-serine phosphorylation	3.71725	0.017287	0.814752	0.632084	null
GO:0033138	positive regulation of peptidyl-serine phosphorylation	3.59017	0.012901	0.757631	0.660404	null
GO:0033700	phospholipid efflux	2.68842	0.001615	0.981673	0.49557	null
GO:0034063	stress granule assembly	3.3694	0.007758	0.988388	0.331417	null
GO:0035811	negative regulation of urine volume	2.10037	0.000414	0.757889	0.367572	null
GO:0003093	regulation of glomerular filtration	2.45788	0.000948	0.656239	0.736523	35811
GO:0003105	negative regulation of glomerular filtration	1.51851	0.000106	0.660404	0.904377	35811
GO:0038003	G protein-coupled opioid receptor signaling pathway	3.41229	0.008564	0.795003	0.132911	null
GO:0038169	somatostatin receptor signaling pathway	3.50024	0.010487	0.793109	0.442917	null
GO:0038170	somatostatin signaling pathway	3.50024	0.010487	0.752587	0.53831	null
GO:0042711	maternal behavior	2.51455	0.001081	0.885828	0.558875	null
GO:0060746	parental behavior	2.56229	0.001207	0.885357	0.818154	42711
GO:0042752	regulation of circadian rhythm	3.99577	0.032831	0.854088	0	null
GO:0042753	positive regulation of circadian rhythm	3.27508	0.006243	0.755264	0.127382	null
GO:0042984	regulation of amyloid precursor protein biosynthetic process	2.65418	0.001492	0.835159	0.17164	null
GO:0042985	negative regulation of amyloid precursor protein biosynthetic process	2.31806	0.000686	0.804113	0.863272	42984
GO:0043587	tongue morphogenesis	2.65225	0.001485	0.989627	0	null
GO:0043691	reverse cholesterol transport	3.02694	0.003524	0.983379	0	null
GO:0043951	negative regulation of cAMP-mediated signaling	2.6561	0.001499	0.792879	0.461996	null
GO:0044060	regulation of endocrine process	3.15866	0.004774	0.745517	0.125481	null
GO:1903524	positive regulation of blood circulation	3.29026	0.006465	0.698702	0.703675	44060
GO:0044524	protein sulfhydration	1.69897	0.000162	0.976726	0.02499	null
GO:0045329	carnitine biosynthetic process	3.36342	0.007652	0.969726	0.072829	null
GO:0045777	positive regulation of blood pressure	2.8739	0.002477	0.741058	0.402495	null
GO:0003073	regulation of systemic arterial blood pressure	3.57322	0.012407	0.723091	0.80132	45777
GO:0046005	positive regulation of circadian sleep/wake cycle, REM sleep	1	2.98e-05	0.742232	0.649141	null
GO:0010840	regulation of circadian sleep/wake cycle, wakefulness	1.8451	0.000229	0.759697	0.740411	46005
GO:0010841	positive regulation of circadian sleep/wake cycle, wakefulness	1.78533	0.000199	0.724598	0.738029	46005
GO:0042749	regulation of circadian sleep/wake cycle	3.28058	0.006323	0.733272	0.870508	46005
GO:0045187	regulation of circadian sleep/wake cycle, sleep	3.24822	0.005869	0.727704	0.850648	46005
GO:0045938	positive regulation of circadian sleep/wake cycle, sleep	2.3784	0.000789	0.710277	0.899652	46005
GO:0046048	UDP metabolic process	2.78604	0.002023	0.933062	0.579425	null
GO:0009193	pyrimidine ribonucleoside diphosphate metabolic process	2.79519	0.002066	0.950093	0.730927	46048
GO:0048136	male germ-line cyst formation	1.11394	3.98e-05	0.912644	0.285205	null
GO:0048137	spermatocyte division	2.26007	0.0006	0.903861	0.508315	null
GO:0051481	negative regulation of cytosolic calcium ion concentration	2.57634	0.001247	0.81818	0.110071	null
GO:0051482	positive regulation of cytosolic calcium ion concentration involved in phospholipase C-activating G protein-coupled signaling pathway	2.95904	0.003014	0.744697	0.414989	null
GO:0051923	sulfation	3.83378	0.022609	0.974772	0.034797	null
GO:0060125	negative regulation of growth hormone secretion	1.89763	0.000259	0.705833	0.656957	null
GO:0060147	regulation of post-transcriptional gene silencing	3.51706	0.010902	0.850644	0.20126	null
GO:0060155	platelet dense granule organization	3.27138	0.00619	0.988451	0.004355	null
GO:0060454	positive regulation of gastric acid secretion	0.954243	2.65e-05	0.703282	0.549544	null
GO:0046877	regulation of saliva secretion	2.43297	0.000895	0.668063	0.747192	60454
GO:0060903	positive regulation of meiosis I	2.15534	0.000471	0.79634	0.483771	null
GO:0060964	regulation of miRNA-mediated gene silencing	3.29203	0.006492	0.830191	0.195704	null
GO:0060148	positive regulation of post-transcriptional gene silencing	2.98453	0.003196	0.782289	0.912606	60964
GO:2000637	positive regulation of miRNA-mediated gene silencing	2.93399	0.002845	0.782751	0.944152	60964
GO:0060966	regulation of gene silencing by RNA	3.51268	0.010792	0.850714	0.131446	null
GO:0061356	regulation of Wnt protein secretion	2.36549	0.000766	0.755361	0.448448	null
GO:0061358	negative regulation of Wnt protein secretion	1.73239	0.000176	0.74442	0.61563	null
GO:0071266	de novo' L-methionine biosynthetic process	4.21632	0.054558	0.939344	0.496977	null
GO:0071315	cellular response to morphine	2.21748	0.000544	0.889883	0.515733	null
GO:0048148	behavioral response to cocaine	2.72099	0.001741	0.801973	0.818955	71315
GO:0071317	cellular response to isoquinoline alkaloid	2.22531	0.000554	0.88981	0.900387	71315
GO:0090107	regulation of high-density lipoprotein particle assembly	2.13354	0.000448	0.758033	0.492328	null
GO:0106070	regulation of adenylate cyclase-activating G protein-coupled receptor signaling pathway	2.76118	0.00191	0.815772	0.406933	null
GO:0106072	negative regulation of adenylate cyclase-activating G protein-coupled receptor signaling pathway	2.57634	0.001247	0.790519	0.717525	106070
GO:1901386	negative regulation of voltage-gated calcium channel activity	3.34967	0.007414	0.704515	0.658019	null
GO:1903937	response to acrylamide	0.90309	2.32e-05	0.918697	0	null
GO:1904058	positive regulation of sensory perception of pain	1.93952	0.000285	0.733307	0.606994	null
GO:1904481	response to tetrahydrofolate	1.716	0.000169	0.912671	0.443761	null
GO:1904482	cellular response to tetrahydrofolate	1.716	0.000169	0.905238	0.412911	null
GO:1904829	regulation of aortic smooth muscle cell differentiation	1.70757	0.000166	0.836277	0.105714	null
GO:0051152	positive regulation of smooth muscle cell differentiation	2.62839	0.001406	0.775166	0.832431	1904829
GO:1904831	positive regulation of aortic smooth muscle cell differentiation	1.69897	0.000162	0.790526	0.891219	1904829
GO:1905065	positive regulation of vascular associated smooth muscle cell differentiation	2.38202	0.000796	0.777895	0.889417	1904829
GO:1905214	regulation of RNA binding	2.72181	0.001744	0.816035	0.643007	null
GO:1905535	regulation of eukaryotic translation initiation factor 4F complex assembly	1.83251	0.000222	0.848846	0.107185	null
GO:1905537	positive regulation of eukaryotic translation initiation factor 4F complex assembly	1.6902	0.000159	0.799467	0.473021	null
GO:1905606	regulation of presynapse assembly	3.64395	0.014602	0.757788	0.520357	null
GO:0099174	regulation of presynapse organization	3.66586	0.015358	0.760942	0.870008	1905606
GO:1905612	positive regulation of mRNA cap binding	1.6902	0.000159	0.813912	0.583635	null
GO:1902415	regulation of mRNA binding	2.51587	0.001084	0.801424	0.957367	1905612
GO:1902416	positive regulation of mRNA binding	2.50515	0.001058	0.800409	0.921646	1905612
GO:1905216	positive regulation of RNA binding	2.62118	0.001383	0.799562	0.968704	1905612
GO:1905610	regulation of mRNA cap binding	1.6902	0.000159	0.813912	0.856273	1905612
GO:1905696	regulation of polysome binding	2.02119	0.000345	0.827304	0.33216	null
GO:1990708	conditioned place preference	1.92942	0.000279	0.894113	0.279682	null
GO:1990823	response to leukemia inhibitory factor	3.60724	0.013418	0.903475	0.686904	null
GO:1990830	cellular response to leukemia inhibitory factor	3.60239	0.013269	0.896314	0.438306	null

## Sheet: Inversion_Chr4L
TermID	Name	LogSize	Frequency	Uniqueness	Dispensability	Representative
GO:0001178	regulation of transcriptional start site selection at RNA polymerase II promoter	2.02531	0.000348	0.930316	0	null
GO:0002237	response to molecule of bacterial origin	4.05873	0.037954	0.900199	0.436214	null
GO:0002540	leukotriene production involved in inflammatory response	1.92942	0.000279	0.92955	0.276806	null
GO:0006568	tryptophan metabolic process	4.94611	0.292863	0.879724	0.255946	null
GO:0006586	indolalkylamine metabolic process	4.94612	0.292869	0.92479	0.993413	6568
GO:0006919	activation of cysteine-type endopeptidase activity involved in apoptotic process	3.59671	0.013097	0.873232	0.362388	null
GO:0007589	body fluid secretion	3.44778	0.009294	0.864158	0.126957	null
GO:0008365	adult chitin-based cuticle development	1.73239	0.000176	0.937707	0.275799	null
GO:0010044	response to aluminum ion	3.07151	0.003906	0.926945	0.502539	null
GO:0016180	snRNA processing	4.01586	0.034386	0.953493	0.03516	null
GO:0017000	antibiotic biosynthetic process	4.54841	0.117209	0.96777	0.1193	null
GO:0019694	alkanesulfonate metabolic process	3.4216	0.00875	0.987466	0	null
GO:0030879	mammary gland development	3.62055	0.013836	0.934133	0.333092	null
GO:0007595	lactation	2.99913	0.003306	0.810819	0.751548	30879
GO:0033231	carbohydrate export	0.477121	6.63e-06	0.962835	0.08701	null
GO:0034418	urate biosynthetic process	1.91381	0.000269	0.904662	0.315755	null
GO:0034465	response to carbon monoxide	1.74819	0.000182	0.917403	0.239473	null
GO:0043215	daunorubicin transport	3.83078	0.022453	0.9379	0.213855	null
GO:1901656	glycoside transport	3.84997	0.023468	0.939146	0.715749	43215
GO:0044806	G-quadruplex DNA unwinding	2.49831	0.001041	0.95965	0.003159	null
GO:0045601	regulation of endothelial cell differentiation	3.18242	0.005043	0.867321	0.566848	null
GO:0045602	negative regulation of endothelial cell differentiation	2.55509	0.001187	0.856181	0.796977	45601
GO:0046100	hypoxanthine metabolic process	3.44326	0.009197	0.847191	0.655797	null
GO:0006145	purine nucleobase catabolic process	4.00441	0.033491	0.827385	0.717393	46100
GO:0009114	hypoxanthine catabolic process	2.11059	0.000424	0.856344	0.736533	46100
GO:0009115	xanthine catabolic process	2.13672	0.000451	0.855992	0.738732	46100
GO:0046110	xanthine metabolic process	3.29907	0.006598	0.849513	0.371342	null
GO:0046113	nucleobase catabolic process	4.21951	0.054959	0.847683	0.62987	null
GO:0006206	pyrimidine nucleobase metabolic process	4.85273	0.236203	0.840452	0.796133	46113
GO:0046305	alkanesulfonate biosynthetic process	2.99123	0.003246	0.915698	0.090968	null
GO:0019452	L-cysteine catabolic process to taurine	0.69897	1.33e-05	0.87605	0.713995	46305
GO:0019530	taurine metabolic process	3.21643	0.005454	0.868688	0.927257	46305
GO:0042412	taurine biosynthetic process	2.99123	0.003246	0.862643	0.927257	46305
GO:0046415	urate metabolic process	3.76238	0.019181	0.896058	0.15813	null
GO:0046831	regulation of RNA export from nucleus	2.81823	0.002178	0.891057	0.593831	null
GO:0048058	compound eye corneal lens development	1.23045	5.3e-05	0.93345	0.421963	null
GO:0048066	developmental pigmentation	3.55943	0.012019	0.980512	0	null
GO:0048072	compound eye pigmentation	1.8921	0.000255	0.980512	0.734392	48066
GO:0048855	adenohypophysis morphogenesis	2.06819	0.000385	0.91817	0.675839	null
GO:0050665	hydrogen peroxide biosynthetic process	3.055	0.00376	0.972751	0.015961	null
GO:0051121	hepoxilin metabolic process	2.31597	0.000683	0.92088	0.607312	null
GO:0051122	hepoxilin biosynthetic process	2.31597	0.000683	0.911604	0.091503	null
GO:0061092	positive regulation of phospholipid translocation	2.32015	0.00069	0.784126	0.574315	null
GO:0061091	regulation of phospholipid translocation	2.43136	0.000892	0.807692	0.923688	61092
GO:0061817	endoplasmic reticulum-plasma membrane tethering	3.64787	0.014734	0.918725	0.31278	null
GO:0051643	endoplasmic reticulum localization	3.65552	0.014996	0.918674	0.8202	61817
GO:0070252	actin-mediated cell contraction	3.36642	0.007705	0.954764	0.004085	null
GO:0030049	muscle filament sliding	2.26951	0.000613	0.916478	0.803425	70252
GO:0033275	actin-myosin filament sliding	2.45485	0.000942	0.954569	0.798682	70252
GO:0071217	cellular response to external biotic stimulus	1.20412	4.97e-05	0.956193	0.003292	null
GO:0071440	regulation of histone H3-K14 acetylation	2.3075	0.00067	0.91387	0.148451	null
GO:0071441	negative regulation of histone H3-K14 acetylation	1.6721	0.000153	0.898475	0.685852	null
GO:0090091	positive regulation of extracellular matrix disassembly	2.44091	0.000912	0.85414	0.320384	null
GO:1904259	regulation of basement membrane assembly involved in embryonic body morphogenesis	2.19313	0.000514	0.846741	0.969392	90091
GO:1904261	positive regulation of basement membrane assembly involved in embryonic body morphogenesis	2.19313	0.000514	0.820301	0.875238	90091
GO:0097184	response to azide	1.74036	0.000179	0.928967	0.118035	null
GO:0099039	sphingolipid translocation	2.1959	0.000517	0.847022	0.389101	null
GO:0099040	ceramide translocation	1.86332	0.000239	0.851355	0.556652	null
GO:0099636	cytoplasmic streaming	0.778151	1.66e-05	0.969337	0	null
GO:1900430	positive regulation of filamentous growth of a population of unicellular organisms	2.53656	0.001137	0.885097	0.094147	null
GO:0090033	positive regulation of filamentous growth	2.53656	0.001137	0.885097	0.950715	1900430
GO:1900746	regulation of vascular endothelial growth factor signaling pathway	3.03941	0.003627	0.870089	0.1187	null
GO:1900747	negative regulation of vascular endothelial growth factor signaling pathway	2.73239	0.001787	0.857366	0.95919	1900746
GO:1902547	regulation of cellular response to vascular endothelial growth factor stimulus	3.07299	0.003919	0.8874	0.705714	1900746
GO:1902548	negative regulation of cellular response to vascular endothelial growth factor stimulus	2.79796	0.002079	0.860982	0.966096	1900746
GO:1901529	positive regulation of anion channel activity	2.11394	0.000428	0.865992	0.506016	null
GO:1901557	response to fenofibrate	1.59106	0.000126	0.913758	0.382792	null
GO:1903412	response to bile acid	2.30963	0.000673	0.908676	0.495005	null
GO:1903413	cellular response to bile acid	2.14613	0.000461	0.905741	0.521536	null
GO:1903416	response to glycoside	2.00432	0.000332	0.915661	0.39713	null
GO:1904976	cellular response to bleomycin	1.94939	0.000292	0.906837	0.44562	null
GO:1990962	xenobiotic transport across blood-brain barrier	1.94939	0.000292	0.930671	0.098621	null
GO:1990963	establishment of blood-retinal barrier	1.63347	0.000139	0.958255	0.003428	null
GO:2000197	regulation of ribonucleoprotein complex localization	2.74663	0.001847	0.892577	0.106419	null
GO:2001212	regulation of vasculogenesis	2.78319	0.002009	0.884636	0.11501	null
GO:2001213	negative regulation of vasculogenesis	1.74036	0.000179	0.877559	0.488163	null

## Sheet: Inversion_Chr11L
TermID	Name	LogSize	Frequency	Uniqueness	Dispensability	Representative
GO:0000022	mitotic spindle elongation	2.73878	0.001814	0.729574	0.660253	null
GO:0000132	establishment of mitotic spindle orientation	3.53643	0.011399	0.361263	0.973133	22
GO:0040001	establishment of mitotic spindle localization	3.64058	0.014489	0.42403	0.769416	22
GO:0051256	mitotic spindle midzone assembly	2.59988	0.001316	0.726188	0.926895	22
GO:0051293	establishment of spindle localization	3.69241	0.016326	0.428702	0.988167	22
GO:0051294	establishment of spindle orientation	3.56253	0.012105	0.366518	0.976408	22
GO:0000086	G2/M transition of mitotic cell cycle	3.41597	0.008637	0.879325	0.005038	null
GO:0044839	cell cycle G2/M phase transition	3.44326	0.009197	0.888634	0.820509	86
GO:0001927	exocyst assembly	1.11394	3.98e-05	0.598115	0.457205	null
GO:0006582	melanin metabolic process	3.82872	0.022347	0.960471	0.582894	null
GO:0035006	melanization defense response	3.10619	0.004231	0.893738	0.733799	6582
GO:0035011	melanotic encapsulation of foreign target	2.22011	0.000547	0.899667	0.757604	6582
GO:0006836	neurotransmitter transport	4.37745	0.079067	0.857179	0.162243	null
GO:0006997	nucleus organization	4.20909	0.053656	0.857146	0.404343	null
GO:0007097	nuclear migration	3.20978	0.005371	0.569294	0.659392	null
GO:0035046	pronuclear migration	1.87506	0.000245	0.602768	0.848807	7097
GO:0007338	single fertilization	4.1682	0.048835	0.976939	0	null
GO:0007349	cellularization	2.97681	0.00314	0.908793	0.451553	null
GO:0009553	embryo sac development	3.27944	0.006306	0.890849	0.452535	null
GO:0009559	embryo sac central cell differentiation	2.68034	0.001585	0.884443	0.904147	9553
GO:0009561	megagametogenesis	2.98945	0.003233	0.890346	0.852403	9553
GO:0010197	polar nucleus fusion	2.66558	0.001532	0.775168	0.934036	9553
GO:0010457	centriole-centriole cohesion	3.10175	0.004188	0.738118	0.600032	null
GO:0051299	centrosome separation	3.16643	0.004861	0.736396	0.785068	10457
GO:0019882	antigen processing and presentation	3.96942	0.030898	0.917507	0.512683	null
GO:0019884	antigen processing and presentation of exogenous antigen	3.11628	0.00433	0.900268	0.562541	null
GO:0002478	antigen processing and presentation of exogenous peptide antigen	3.03743	0.003611	0.896468	0.872438	19884
GO:0002495	antigen processing and presentation of peptide antigen via MHC class II	2.8893	0.002566	0.899103	0.783764	19884
GO:0002504	antigen processing and presentation of peptide or polysaccharide antigen via MHC class II	3.45834	0.009522	0.896876	0.836992	19884
GO:0019886	antigen processing and presentation of exogenous peptide antigen via MHC class II	2.84199	0.002301	0.898054	0.961029	19884
GO:0048002	antigen processing and presentation of peptide antigen	3.5387	0.011459	0.896054	0.88142	19884
GO:0021517	ventral spinal cord development	3.63448	0.014287	0.904392	0.409545	null
GO:0022406	membrane docking	4.16711	0.048713	0.993058	0.00502	null
GO:0030397	membrane disassembly	2.48996	0.001021	0.900585	0.500939	null
GO:0030859	polarized epithelial cell differentiation	3.00775	0.003372	0.909767	0.321289	null
GO:0032252	secretory granule localization	2.30103	0.00066	0.616854	0.126323	null
GO:0033059	cellular pigmentation	3.7641	0.019257	0.905671	0.005287	null
GO:0032400	melanosome localization	3.40943	0.008508	0.54734	0.992777	33059
GO:0032401	establishment of melanosome localization	3.38668	0.008073	0.517564	0.977903	33059
GO:0032402	melanosome transport	3.2235	0.005544	0.525105	0.8764	33059
GO:0051875	pigment granule localization	3.42716	0.008863	0.550665	0.89939	33059
GO:0051904	pigment granule transport	3.23401	0.00568	0.524623	0.959124	33059
GO:0051905	establishment of pigment granule localization	3.40209	0.008365	0.516984	0.994656	33059
GO:0034453	microtubule anchoring	3.74437	0.018402	0.750665	0.37854	null
GO:0034454	microtubule anchoring at centrosome	3.25455	0.005955	0.758801	0.611557	null
GO:0072393	microtubule anchoring at microtubule organizing center	3.28556	0.006396	0.758035	0.887125	34454
GO:0034501	protein localization to kinetochore	3.4609	0.009579	0.765448	0.16778	null
GO:0071459	protein localization to chromosome, centromeric region	3.51068	0.010743	0.764184	0.876135	34501
GO:0035010	encapsulation of foreign target	2.35218	0.000743	0.926982	0	null
GO:0035047	centrosomal and pronuclear rotation	0.90309	2.32e-05	0.916203	0.64712	null
GO:0042051	compound eye photoreceptor development	2.72346	0.001751	0.888926	0.503777	null
GO:0016330	second mitotic wave involved in compound eye morphogenesis	1.73239	0.000176	0.819702	0.802182	42051
GO:0042052	rhabdomere development	2.4133	0.000855	0.79049	0.899029	42051
GO:0043647	inositol phosphate metabolic process	4.663	0.1526	0.966439	0.006063	null
GO:0048193	Golgi vesicle transport	5.10109	0.418454	0.803105	0.221622	null
GO:0050905	neuromuscular process	3.82892	0.022357	0.938299	0.374686	null
GO:0051081	nuclear membrane disassembly	2.37658	0.000786	0.872343	0.212549	null
GO:0051231	spindle elongation	3.02036	0.003471	0.737775	0.594067	null
GO:0051255	spindle midzone assembly	2.98046	0.003166	0.73159	0.678089	null
GO:0051383	kinetochore organization	3.93166	0.028325	0.857929	0.318624	null
GO:0051601	exocyst localization	2.27875	0.000627	0.889047	0	null
GO:0051642	centrosome localization	3.20276	0.005285	0.87467	0.126025	null
GO:0051646	mitochondrion localization	3.65715	0.015053	0.596773	0.58812	null
GO:0051648	vesicle localization	4.33443	0.07161	0.566062	0.818159	51646
GO:0051653	spindle localization	3.71096	0.017039	0.538714	0.746258	51646
GO:0140056	organelle localization by membrane tethering	4.15287	0.047141	0.568596	0.74064	51646
GO:0051654	establishment of mitochondrion localization	3.23654	0.005713	0.591328	0.656475	null
GO:0019896	axonal transport of mitochondrion	2.76193	0.001913	0.502325	0.95376	51654
GO:0034643	establishment of mitochondrion localization, microtubule-mediated	3.16316	0.004824	0.525833	0.981068	51654
GO:0047496	vesicle transport along microtubule	3.4188	0.008693	0.463338	0.906094	51654
GO:0047497	mitochondrion transport along microtubule	3.14675	0.004645	0.490183	0.891264	51654
GO:0060236	regulation of mitotic spindle organization	3.73902	0.018176	0.90579	0.464585	null
GO:0010968	regulation of microtubule nucleation	2.94939	0.002948	0.904507	0.775644	60236
GO:0031112	positive regulation of microtubule polymerization or depolymerization	3.24699	0.005852	0.903121	0.851762	60236
GO:0031113	regulation of microtubule polymerization	3.42259	0.00877	0.903873	0.822747	60236
GO:0031116	positive regulation of microtubule polymerization	3.10449	0.004214	0.900135	0.911012	60236
GO:0090063	positive regulation of microtubule nucleation	2.51455	0.001081	0.905474	0.854325	60236
GO:0090224	regulation of spindle organization	3.75427	0.018826	0.905645	0.859309	60236
GO:0061339	establishment or maintenance of monopolar cell polarity	3.06221	0.003823	0.88686	0.004368	null
GO:0035088	establishment or maintenance of apical/basal cell polarity	3.36267	0.007639	0.872519	0.990101	61339
GO:0035089	establishment of apical/basal cell polarity	3.02036	0.003471	0.86673	0.982867	61339
GO:0045197	establishment or maintenance of epithelial cell apical/basal polarity	3.31281	0.00681	0.873041	0.730693	61339
GO:0045198	establishment of epithelial cell apical/basal polarity	2.91856	0.002745	0.790094	0.943292	61339
GO:0061162	establishment of monopolar cell polarity	3.0465	0.003687	0.873613	0.993484	61339
GO:0061245	establishment or maintenance of bipolar cell polarity	3.3784	0.007921	0.88313	0.758654	61339
GO:0090162	establishment of epithelial cell polarity	3.38881	0.008113	0.875754	0.765695	61339
GO:0061744	motor behavior	2.93752	0.002868	0.943609	0	null
GO:0061842	microtubule organizing center localization	3.21801	0.005474	0.874453	0.139918	null
GO:0070050	neuron cellular homeostasis	3.38952	0.008127	0.993698	0	null
GO:0080186	developmental vegetative growth	2.33244	0.00071	0.937676	0	null
GO:0097479	synaptic vesicle localization	3.31534	0.00685	0.577899	0.672618	null
GO:0051650	establishment of vesicle localization	4.32329	0.069796	0.495036	0.858626	97479
GO:0090522	vesicle tethering involved in exocytosis	3.73878	0.018166	0.45186	0.911358	97479
GO:0099022	vesicle tethering	3.89398	0.025971	0.45456	0.932342	97479
GO:0099518	vesicle cytoskeletal trafficking	3.60195	0.013256	0.519987	0.893625	97479
GO:0097711	ciliary basal body-plasma membrane docking	1.77815	0.000196	0.584695	0.58783	null
GO:0098876	vesicle-mediated transport to the plasma membrane	4.3296	0.070818	0.728693	0.631247	null
GO:0006888	endoplasmic reticulum to Golgi vesicle-mediated transport	4.82845	0.223358	0.682555	0.771078	98876
GO:0006893	Golgi to plasma membrane transport	3.9874	0.032204	0.736549	0.706187	98876
GO:0098930	axonal transport	3.36996	0.007768	0.617721	0.523678	null
GO:0008090	retrograde axonal transport	2.76864	0.001943	0.638729	0.906068	98930
GO:0048489	synaptic vesicle transport	3.24773	0.005862	0.536404	0.963617	98930
GO:0048491	retrograde synaptic vesicle transport	1.20412	4.97e-05	0.544764	0.76756	98930
GO:0097480	establishment of synaptic vesicle localization	3.05269	0.003886	0.544306	0.777314	98930
GO:0099514	synaptic vesicle cytoskeletal transport	2.84386	0.002311	0.537565	0.920558	98930
GO:0099517	synaptic vesicle transport along microtubule	2.84386	0.002311	0.482875	0.920558	98930
GO:0099519	dense core granule cytoskeletal transport	1.95904	0.000298	0.565965	0.651354	null
GO:0032253	dense core granule localization	1.95904	0.000298	0.614006	0.937623	99519
GO:1901950	dense core granule transport	1.95904	0.000298	0.582501	0.999997	99519
GO:1990049	retrograde neuronal dense core vesicle transport	1.36173	7.29e-05	0.532782	0.947535	99519
GO:0099558	maintenance of synapse structure	2.97864	0.003153	0.900438	0.004325	null
GO:0099643	signal release from synapse	4.07972	0.039833	0.817116	0.186806	null
GO:0007269	neurotransmitter secretion	4.07972	0.039833	0.679593	0.948567	99643
GO:0016080	synaptic vesicle targeting	2.13672	0.000451	0.550724	0.737484	99643
GO:0061670	evoked neurotransmitter secretion	1.8451	0.000229	0.744687	0.713444	99643
GO:1904398	positive regulation of neuromuscular junction development	2.56229	0.001207	0.921159	0.098944	null
GO:1905515	non-motile cilium assembly	3.78554	0.020232	0.847056	0.55109	null
GO:1990535	neuron projection maintenance	2.62221	0.001386	0.895016	0.218145	null
GO:2000535	regulation of entry of bacterium into host cell	2.50106	0.001048	0.980921	0	null

## Sheet: Inversion_Chr16L
TermID	Name	LogSize	Frequency	Uniqueness	Dispensability	Representative
GO:0000304	response to singlet oxygen	2.88479	0.00254	0.902264	0.573215	null
GO:0000743	nuclear migration involved in conjugation with cellular fusion	1.85126	0.000232	0.943209	0.553851	null
GO:0001541	ovarian follicle development	3.48373	0.010096	0.873666	0.676666	null
GO:0009908	flower development	3.9111	0.027015	0.869454	0.760693	1541
GO:0090567	reproductive shoot system development	3.92143	0.027665	0.869293	0.867548	1541
GO:0001782	B cell homeostasis	3.08955	0.004072	0.817764	0.571023	null
GO:0001816	cytokine production	2.95231	0.002967	0.913578	0.34265	null
GO:0001821	histamine secretion	2.01284	0.000338	0.961462	0.264344	null
GO:0002441	histamine secretion involved in inflammatory response	1.94939	0.000292	0.721775	0.916468	1821
GO:0002553	histamine secretion by mast cell	1.94939	0.000292	0.635976	0.999997	1821
GO:0001824	blastocyst development	3.6066	0.013398	0.886165	0.473898	null
GO:0001835	blastocyst hatching	2.96237	0.003037	0.890969	0.790324	1824
GO:0035188	hatching	3.02898	0.003541	0.893016	0.988184	1824
GO:0001878	response to yeast	2.88252	0.002526	0.921399	0.355961	null
GO:0050832	defense response to fungus	4.28992	0.064634	0.893073	0.790538	1878
GO:0002349	histamine production involved in inflammatory response	1.94939	0.000292	0.860476	0.578534	null
GO:0002443	leukocyte mediated immunity	4.11311	0.043016	0.873986	0	null
GO:0002263	cell activation involved in immune response	3.8917	0.025835	0.821297	0.896675	2443
GO:0002275	myeloid cell activation involved in immune response	3.41095	0.008538	0.824604	0.936107	2443
GO:0002366	leukocyte activation involved in immune response	3.88479	0.025427	0.817029	0.895784	2443
GO:0002444	myeloid leukocyte mediated immunity	3.36248	0.007636	0.883039	0.833247	2443
GO:0002446	neutrophil mediated immunity	2.95617	0.002994	0.884702	0.790307	2443
GO:0002448	mast cell mediated immunity	3.10072	0.004178	0.882911	0.924837	2443
GO:0002522	leukocyte migration involved in immune response	2.10721	0.000421	0.858134	0.713294	2443
GO:0002679	respiratory burst involved in defense response	2.42651	0.000882	0.841891	0.740491	2443
GO:0043299	leukocyte degranulation	3.20575	0.005322	0.847884	0.816145	2443
GO:0045728	respiratory burst after phagocytosis	2.04532	0.000365	0.847773	0.810394	2443
GO:0002507	tolerance induction	2.82413	0.002208	0.813271	0.552109	null
GO:0002513	tolerance induction to self antigen	2.40483	0.000839	0.82119	0.727641	2507
GO:0002532	production of molecular mediator involved in inflammatory response	3.04297	0.003657	0.847107	0.346157	null
GO:0002576	platelet degranulation	2.57634	0.001247	0.950749	0.420512	null
GO:0002685	regulation of leukocyte migration	4.02366	0.035009	0.704063	0.638851	null
GO:0002218	activation of innate immune response	4.23096	0.056428	0.535388	0.733176	2685
GO:0002220	innate immune response activating cell surface receptor signaling pathway	3.62003	0.013819	0.516687	0.880308	2685
GO:0002223	stimulatory C-type lectin receptor signaling pathway	2.49969	0.001044	0.559227	0.760331	2685
GO:0002688	regulation of leukocyte chemotaxis	3.78611	0.020258	0.677624	0.932905	2685
GO:0050851	antigen receptor-mediated signaling pathway	3.84217	0.02305	0.510977	0.902349	2685
GO:0050852	T cell receptor signaling pathway	3.54033	0.011502	0.525565	0.814407	2685
GO:0050853	B cell receptor signaling pathway	3.60423	0.013325	0.522493	0.930697	2685
GO:0071675	regulation of mononuclear cell migration	3.76679	0.019376	0.710905	0.77792	2685
GO:0090025	regulation of monocyte chemotaxis	3.24452	0.005819	0.695874	0.869314	2685
GO:0002765	immune response-inhibiting signal transduction	2.26951	0.000613	0.680443	0.520117	null
GO:0002767	immune response-inhibiting cell surface receptor signaling pathway	2.10721	0.000421	0.673707	0.584798	null
GO:0002774	Fc receptor mediated inhibitory signaling pathway	1.81954	0.000216	0.682183	0.944061	2767
GO:0002886	regulation of myeloid leukocyte mediated immunity	3.2413	0.005776	0.729339	0.112906	null
GO:0002705	positive regulation of leukocyte mediated immunity	3.72049	0.017417	0.653605	0.884872	2886
GO:0002888	positive regulation of myeloid leukocyte mediated immunity	2.77597	0.001976	0.684413	0.791348	2886
GO:0003254	regulation of membrane depolarization	3.25959	0.006024	0.829338	0.433753	null
GO:0006882	cellular zinc ion homeostasis	3.66829	0.015444	0.983405	0.005527	null
GO:0046916	cellular transition metal ion homeostasis	4.82829	0.223278	0.981994	0.786059	6882
GO:0055069	zinc ion homeostasis	3.69381	0.016379	0.985741	0.767071	6882
GO:0006887	exocytosis	4.79984	0.209121	0.945522	0.675063	null
GO:0045055	regulated exocytosis	4.00941	0.033879	0.947681	0.722799	6887
GO:0006897	endocytosis	4.98965	0.323747	0.955377	0.589785	null
GO:0006919	activation of cysteine-type endopeptidase activity involved in apoptotic process	3.59671	0.013097	0.731703	0.697177	null
GO:0006970	response to osmotic stress	4.17612	0.049734	0.909876	0.602257	null
GO:0006991	response to sterol depletion	3.51068	0.010743	0.926217	0.299992	null
GO:0007172	signal complex assembly	3.16167	0.004808	0.759069	0.474216	null
GO:0007229	integrin-mediated signaling pathway	4.43966	0.091245	0.752354	0.536174	null
GO:0007259	receptor signaling pathway via JAK-STAT	3.55979	0.012029	0.77678	0.177303	null
GO:0007272	ensheathment of neurons	3.89642	0.026117	0.880298	0.603708	null
GO:0007617	mating behavior	3.26811	0.006144	0.896924	0.440363	null
GO:0060179	male mating behavior	2.86629	0.002434	0.901253	0.916353	7617
GO:0007618	mating	1.92942	0.000279	0.96891	0	null
GO:0007565	female pregnancy	3.53706	0.011416	0.893203	0.81554	7618
GO:0007566	embryo implantation	3.04805	0.0037	0.882274	0.924942	7618
GO:0008283	cell population proliferation	4.56711	0.122365	0.997276	0	null
GO:0009555	pollen development	3.66988	0.0155	0.888202	0.443965	null
GO:0009620	response to fungus	4.39893	0.083075	0.907688	0.567111	null
GO:0098542	defense response to other organism	5.2957	0.655025	0.879534	0.786586	9620
GO:0009651	response to salt stress	3.94131	0.028962	0.912427	0.651934	null
GO:0009725	response to hormone	5.14321	0.461073	0.872119	0.632754	null
GO:0030518	intracellular steroid hormone receptor signaling pathway	3.48416	0.010106	0.754265	0.897697	9725
GO:0030520	intracellular estrogen receptor signaling pathway	3.03222	0.003568	0.765171	0.848027	9725
GO:0043401	steroid hormone mediated signaling pathway	4.12418	0.044127	0.73595	0.757346	9725
GO:0050847	progesterone receptor signaling pathway	2.50651	0.001061	0.777362	0.792203	9725
GO:0010043	response to zinc ion	3.17173	0.00492	0.921032	0.169118	null
GO:0010310	regulation of hydrogen peroxide metabolic process	2.76042	0.001906	0.841245	0.104224	null
GO:0010727	negative regulation of hydrogen peroxide metabolic process	2.02119	0.000345	0.808242	0.887985	10310
GO:0010728	regulation of hydrogen peroxide biosynthetic process	2.31387	0.00068	0.846077	0.754761	10310
GO:0010730	negative regulation of hydrogen peroxide biosynthetic process	1.65321	0.000146	0.814349	0.857838	10310
GO:0010447	response to acidic pH	3.37712	0.007898	0.927063	0.166957	null
GO:0010469	regulation of signaling receptor activity	3.95703	0.030029	0.738216	0.524404	null
GO:0010543	regulation of platelet activation	3.22089	0.005511	0.795221	0.128352	null
GO:0033003	regulation of mast cell activation	3.23019	0.00563	0.713305	0.70613	10543
GO:0010640	regulation of platelet-derived growth factor receptor signaling pathway	3.0162	0.003438	0.780292	0.125315	null
GO:0010641	positive regulation of platelet-derived growth factor receptor signaling pathway	2.37475	0.000782	0.728046	0.411939	null
GO:0010907	positive regulation of glucose metabolic process	3.1878	0.005106	0.752389	0.184238	null
GO:0010676	positive regulation of cellular carbohydrate metabolic process	3.29557	0.006545	0.74956	0.952363	10907
GO:0010954	positive regulation of protein processing	3.21484	0.005434	0.747597	0.507032	null
GO:1903319	positive regulation of protein maturation	3.2388	0.005743	0.750119	0.911843	10954
GO:0014015	positive regulation of gliogenesis	3.32325	0.006976	0.706429	0.610079	null
GO:0060252	positive regulation of glial cell proliferation	2.82413	0.002208	0.702169	0.898909	14015
GO:0070447	positive regulation of oligodendrocyte progenitor proliferation	1.73239	0.000176	0.729231	0.79922	14015
GO:0016311	dephosphorylation	5.35849	0.756923	0.990858	0.237954	null
GO:0019049	mitigation of host antiviral defense response	3.25864	0.006011	0.918505	0.555655	null
GO:0020027	hemoglobin metabolic process	2.89597	0.002606	0.994852	0.015323	null
GO:0021700	developmental maturation	4.32648	0.07031	0.934208	0.413569	null
GO:0021782	glial cell development	3.7577	0.018975	0.878396	0.537493	null
GO:0014003	oligodendrocyte development	3.27416	0.00623	0.88494	0.874531	21782
GO:0022602	ovulation cycle process	3.29491	0.006535	0.89673	0.633737	null
GO:0001545	primary ovarian follicle growth	1.76343	0.000189	0.889647	0.830264	22602
GO:0031101	fin regeneration	3.15836	0.004771	0.939407	0	null
GO:0031107	septin ring disassembly	1.94939	0.000292	0.971227	0.403825	null
GO:0000921	septin ring assembly	2.98363	0.00319	0.967403	0.878294	31107
GO:0031106	septin ring organization	3.07445	0.003932	0.968288	0.954144	31107
GO:0031344	regulation of cell projection organization	4.5433	0.115837	0.760262	0.677178	null
GO:0031397	negative regulation of protein ubiquitination	3.67136	0.015553	0.771998	0.575665	null
GO:0031648	protein destabilization	3.34084	0.007264	0.84992	0	null
GO:0031663	lipopolysaccharide-mediated signaling pathway	3.17638	0.004973	0.741555	0.572441	null
GO:0031952	regulation of protein autophosphorylation	3.20385	0.005298	0.811933	0.516813	null
GO:0031954	positive regulation of protein autophosphorylation	2.99255	0.003256	0.738795	0.576637	null
GO:0032148	activation of protein kinase B activity	2.94743	0.002934	0.73367	0.654147	null
GO:0045737	positive regulation of cyclin-dependent protein serine/threonine kinase activity	3.77967	0.01996	0.708942	0.731267	32148
GO:1904031	positive regulation of cyclin-dependent protein kinase activity	3.79581	0.020716	0.708419	0.819829	32148
GO:0032185	septin cytoskeleton organization	3.23274	0.005663	0.973216	0.217204	null
GO:0032205	negative regulation of telomere maintenance	3.21378	0.005421	0.730134	0.620963	null
GO:0032418	lysosome localization	3.55388	0.011866	0.971719	0.185572	null
GO:0002279	mast cell activation involved in immune response	3.06108	0.003813	0.828875	0.946935	32418
GO:0043303	mast cell degranulation	3.06108	0.003813	0.786948	0.940596	32418
GO:0032462	regulation of protein homooligomerization	1.85126	0.000232	0.810708	0.37522	null
GO:0032460	negative regulation of protein oligomerization	1.07918	3.65e-05	0.789854	0.875765	32462
GO:0032463	negative regulation of protein homooligomerization	1.07918	3.65e-05	0.789854	0.875765	32462
GO:0033005	positive regulation of mast cell activation	2.79519	0.002066	0.664461	0.67175	null
GO:0031294	lymphocyte costimulation	3.16227	0.004814	0.595168	0.768169	33005
GO:0031295	T cell costimulation	3.14829	0.004662	0.578061	0.72741	33005
GO:0033006	regulation of mast cell activation involved in immune response	3.02612	0.003518	0.633777	0.929952	33005
GO:0033143	regulation of intracellular steroid hormone receptor signaling pathway	3.4843	0.010109	0.768939	0.466055	null
GO:0033146	regulation of intracellular estrogen receptor signaling pathway	3.1784	0.004997	0.776484	0.475174	null
GO:0033623	regulation of integrin activation	2.83123	0.002245	0.796301	0.526765	null
GO:0033625	positive regulation of integrin activation	2.57634	0.001247	0.723268	0.567023	null
GO:0071803	positive regulation of podosome assembly	2.66181	0.001519	0.718578	0.717517	33625
GO:0033628	regulation of cell adhesion mediated by integrin	3.28825	0.006436	0.820811	0.121713	null
GO:0001952	regulation of cell-matrix adhesion	3.70475	0.016797	0.809383	0.724379	33628
GO:0001953	negative regulation of cell-matrix adhesion	3.13925	0.004566	0.774673	0.855168	33628
GO:0010812	negative regulation of cell-substrate adhesion	3.45879	0.009532	0.767841	0.890239	33628
GO:0051893	regulation of focal adhesion assembly	3.33666	0.007195	0.752056	0.889762	33628
GO:0051895	negative regulation of focal adhesion assembly	2.77085	0.001953	0.72973	0.935956	33628
GO:0090109	regulation of cell-substrate junction assembly	3.33666	0.007195	0.781942	0.99068	33628
GO:0034103	regulation of tissue remodeling	3.35545	0.007513	0.819036	0.481945	null
GO:0034135	regulation of toll-like receptor 2 signaling pathway	2.59879	0.001313	0.702078	0.556522	null
GO:0034122	negative regulation of toll-like receptor signaling pathway	3.28556	0.006396	0.648089	0.840639	34135
GO:0034136	negative regulation of toll-like receptor 2 signaling pathway	2.22531	0.000554	0.682817	0.720983	34135
GO:0034143	regulation of toll-like receptor 4 signaling pathway	2.97864	0.003153	0.690596	0.779032	34135
GO:0034144	negative regulation of toll-like receptor 4 signaling pathway	2.49136	0.001025	0.674732	0.740502	34135
GO:0034405	response to fluid shear stress	3.06296	0.00383	0.929892	0	null
GO:0035635	entry of bacterium into host cell	0.954243	2.65e-05	0.983655	0	null
GO:0035988	chondrocyte proliferation	3.04375	0.003664	0.986497	0.005057	null
GO:0061351	neural precursor cell proliferation	3.69688	0.016495	0.985734	0.707842	35988
GO:0036119	response to platelet-derived growth factor	3.0461	0.003684	0.907158	0.642307	null
GO:0036120	cellular response to platelet-derived growth factor stimulus	3.00389	0.003342	0.906342	0.159946	null
GO:0038083	peptidyl-tyrosine autophosphorylation	2.87216	0.002467	0.991172	0.230705	null
GO:0038095	Fc-epsilon receptor signaling pathway	2.71096	0.001701	0.656075	0.655336	null
GO:0038179	neurotrophin signaling pathway	3.32346	0.006979	0.757343	0.66622	null
GO:0042541	hemoglobin biosynthetic process	2.77085	0.001953	0.99446	0.147914	null
GO:0042552	myelination	3.88457	0.025414	0.878387	0.592261	null
GO:0008366	axon ensheathment	3.89586	0.026084	0.878223	0.998012	42552
GO:0043114	regulation of vascular permeability	3.29402	0.006522	0.768932	0.435548	null
GO:0043552	positive regulation of phosphatidylinositol 3-kinase activity	3.031	0.003558	0.735569	0.625159	null
GO:0090218	positive regulation of lipid kinase activity	3.11494	0.004317	0.733268	0.85175	43552
GO:0044706	multi-multicellular organism process	3.88576	0.025484	0.905537	0.404605	null
GO:0045056	transcytosis	3.13322	0.004503	0.881946	0.448138	null
GO:0045124	regulation of bone resorption	3.13862	0.004559	0.82098	0.525002	null
GO:0046850	regulation of bone remodeling	3.23528	0.005696	0.819131	0.960653	45124
GO:0045216	cell-cell junction organization	4.09496	0.041256	0.972049	0.69563	null
GO:0045321	leukocyte activation	4.43791	0.090877	0.87149	0.691208	null
GO:0002274	myeloid leukocyte activation	3.89165	0.025832	0.877911	0.880654	45321
GO:0002283	neutrophil activation involved in immune response	2.72754	0.001767	0.834484	0.917892	45321
GO:0036230	granulocyte activation	3.42553	0.008829	0.878938	0.881956	45321
GO:0042098	T cell proliferation	3.48841	0.010205	0.87506	0.830149	45321
GO:0042119	neutrophil activation	3.39967	0.008319	0.878194	0.868034	45321
GO:0043312	neutrophil degranulation	2.37107	0.000776	0.806212	0.882185	45321
GO:0045576	mast cell activation	3.29513	0.006538	0.880686	0.807935	45321
GO:0050798	activated T cell proliferation	2.54531	0.00116	0.887142	0.849985	45321
GO:0045646	regulation of erythrocyte differentiation	3.33264	0.007129	0.683255	0.694118	null
GO:0002761	regulation of myeloid leukocyte differentiation	3.69836	0.016551	0.66982	0.889839	45646
GO:0002762	negative regulation of myeloid leukocyte differentiation	3.24871	0.005875	0.64594	0.95581	45646
GO:0045582	positive regulation of T cell differentiation	3.76567	0.019327	0.580207	0.974977	45646
GO:0045586	regulation of gamma-delta T cell differentiation	2.54407	0.001157	0.689867	0.990667	45646
GO:0045588	positive regulation of gamma-delta T cell differentiation	2.46389	0.000962	0.628505	0.758508	45646
GO:0045589	regulation of regulatory T cell differentiation	3.08278	0.004009	0.675962	0.753417	45646
GO:0045621	positive regulation of lymphocyte differentiation	3.81358	0.021581	0.597137	0.981463	45646
GO:0045638	negative regulation of myeloid cell differentiation	3.51282	0.010796	0.641723	0.91054	45646
GO:0046645	positive regulation of gamma-delta T cell activation	2.47129	0.000978	0.657978	0.991406	45646
GO:1902106	negative regulation of leukocyte differentiation	3.57669	0.012506	0.634671	0.801283	45646
GO:1902107	positive regulation of leukocyte differentiation	3.94226	0.029025	0.606307	0.908745	45646
GO:0045730	respiratory burst	3.22789	0.0056	0.99911	0	null
GO:0046427	positive regulation of receptor signaling pathway via JAK-STAT	3.13862	0.004559	0.704972	0.565183	null
GO:1904894	positive regulation of receptor signaling pathway via STAT	3.18837	0.005113	0.703453	0.89745	46427
GO:0046628	positive regulation of insulin receptor signaling pathway	2.96473	0.003054	0.710051	0.520224	null
GO:1900078	positive regulation of cellular response to insulin stimulus	3.02407	0.003501	0.713746	0.847494	46628
GO:0046643	regulation of gamma-delta T cell activation	2.55023	0.001174	0.730943	0.653805	null
GO:0046834	lipid phosphorylation	3.09377	0.004111	0.991275	0.182198	null
GO:0046849	bone remodeling	3.48615	0.010152	0.907165	0.364376	null
GO:0045453	bone resorption	3.02857	0.003538	0.901598	0.876677	46849
GO:0046854	phosphatidylinositol phosphate biosynthetic process	4.73982	0.182125	0.989557	0.399232	null
GO:0048008	platelet-derived growth factor receptor signaling pathway	3.45179	0.00938	0.776572	0.469165	null
GO:0048011	neurotrophin TRK receptor signaling pathway	2.87622	0.00249	0.766597	0.631897	null
GO:0048229	gametophyte development	3.77481	0.019738	0.886793	0.484509	null
GO:0048367	shoot system development	4.3857	0.080582	0.876682	0.551062	null
GO:0050855	regulation of B cell receptor signaling pathway	3.086	0.004038	0.690506	0.569433	null
GO:0050856	regulation of T cell receptor signaling pathway	3.30146	0.006634	0.683528	0.927398	50855
GO:0050857	positive regulation of antigen receptor-mediated signaling pathway	3.22994	0.005627	0.633249	0.943247	50855
GO:0050861	positive regulation of B cell receptor signaling pathway	2.83187	0.002248	0.647248	0.87919	50855
GO:0050862	positive regulation of T cell receptor signaling pathway	3.00903	0.003382	0.641032	0.932009	50855
GO:0050982	detection of mechanical stimulus	3.37346	0.007831	0.911711	0.543356	null
GO:0050906	detection of stimulus involved in sensory perception	5.09533	0.412937	0.816762	0.702361	50982
GO:0050966	detection of mechanical stimulus involved in sensory perception of pain	2.64542	0.001462	0.846142	0.902	50982
GO:0050974	detection of mechanical stimulus involved in sensory perception	3.21085	0.005385	0.836529	0.85773	50982
GO:0051017	actin filament bundle assembly	4.07033	0.038981	0.965064	0.515953	null
GO:0030038	contractile actin filament bundle assembly	2.89154	0.00258	0.968995	0.841163	51017
GO:0043149	stress fiber assembly	2.88423	0.002536	0.969018	0.840394	51017
GO:0061572	actin filament bundle organization	4.11438	0.043142	0.967791	0.764293	51017
GO:0051057	positive regulation of small GTPase mediated signal transduction	3.59977	0.013189	0.691203	0.608867	null
GO:0051580	regulation of neurotransmitter uptake	2.74194	0.001827	0.810876	0.490311	null
GO:0051608	histamine transport	2.43775	0.000905	0.978953	0	null
GO:0051900	regulation of mitochondrial depolarization	2.85854	0.002391	0.8337	0.662529	null
GO:0051902	negative regulation of mitochondrial depolarization	2.20952	0.000534	0.808021	0.852998	51900
GO:1904180	negative regulation of membrane depolarization	2.33646	0.000716	0.805657	0.864145	51900
GO:0051972	regulation of telomerase activity	3.45954	0.009549	0.796625	0.528429	null
GO:0032210	regulation of telomere maintenance via telomerase	3.56289	0.012115	0.756604	0.914588	51972
GO:0032211	negative regulation of telomere maintenance via telomerase	3.0162	0.003438	0.73199	0.930554	51972
GO:0051974	negative regulation of telomerase activity	2.90795	0.002679	0.764854	0.844829	51972
GO:1904356	regulation of telomere maintenance via telomere lengthening	3.59781	0.01313	0.759932	0.954911	51972
GO:1904357	negative regulation of telomere maintenance via telomere lengthening	3.09691	0.004141	0.732622	0.964375	51972
GO:2000279	negative regulation of DNA biosynthetic process	3.27531	0.006247	0.775868	0.882596	51972
GO:0060026	convergent extension	3.47596	0.009917	0.933595	0.431932	null
GO:0060027	convergent extension involved in gastrulation	3.23553	0.005699	0.887402	0.70961	60026
GO:0060065	uterus development	2.9722	0.003107	0.881589	0.493265	null
GO:0060251	regulation of glial cell proliferation	3.06856	0.003879	0.830874	0.535191	null
GO:0060333	type II interferon-mediated signaling pathway	3.09517	0.004125	0.681831	0.571437	null
GO:0060368	regulation of Fc receptor mediated stimulatory signaling pathway	2.4014	0.000832	0.716348	0.527513	null
GO:0060369	positive regulation of Fc receptor mediated stimulatory signaling pathway	2.16137	0.000477	0.674211	0.514197	null
GO:0060402	calcium ion transport into cytosol	2.34242	0.000726	0.843567	0.597533	null
GO:0051209	release of sequestered calcium ion into cytosol	3.75997	0.019075	0.724345	0.811129	60402
GO:0051283	negative regulation of sequestering of calcium ion	3.76335	0.019224	0.748942	0.952866	60402
GO:0060603	mammary gland duct morphogenesis	3.05269	0.00374	0.888095	0.69421	null
GO:0060444	branching involved in mammary gland duct morphogenesis	2.90417	0.002656	0.889858	0.942115	60603
GO:0060998	regulation of dendritic spine development	3.16702	0.004867	0.826655	0.396492	null
GO:0060999	positive regulation of dendritic spine development	3.01536	0.003432	0.748162	0.427878	null
GO:0061625	glycolytic process through fructose-1-phosphate	0.60206	9.95e-06	0.993123	0.062263	null
GO:0070373	negative regulation of ERK1 and ERK2 cascade	3.6744	0.015663	0.720666	0.59047	null
GO:0070445	regulation of oligodendrocyte progenitor proliferation	2.32428	0.000696	0.840425	0.109811	null
GO:2000179	positive regulation of neural precursor cell proliferation	3.36192	0.007626	0.735415	0.838964	70445
GO:0070472	regulation of uterine smooth muscle contraction	2.38381	0.000799	0.834942	0.099963	null
GO:0070474	positive regulation of uterine smooth muscle contraction	1.85733	0.000235	0.772665	0.71852	70472
GO:0070666	regulation of mast cell proliferation	2.53403	0.001131	0.833986	0.495678	null
GO:0070667	negative regulation of mast cell proliferation	2.17319	0.000491	0.796634	0.665869	null
GO:0030888	regulation of B cell proliferation	3.40398	0.008402	0.682864	0.862237	70667
GO:0030889	negative regulation of B cell proliferation	2.86982	0.002454	0.663816	0.912681	70667
GO:0032945	negative regulation of mononuclear cell proliferation	3.56691	0.012228	0.767259	0.843504	70667
GO:0050672	negative regulation of lymphocyte proliferation	3.5617	0.012082	0.639622	0.993377	70667
GO:0050869	negative regulation of B cell activation	3.11727	0.00434	0.675777	0.871014	70667
GO:0070668	positive regulation of mast cell proliferation	2.30103	0.00066	0.757606	0.943134	70667
GO:0071393	cellular response to progesterone stimulus	1.86923	0.000242	0.899047	0.443008	null
GO:0071498	cellular response to fluid shear stress	2.85248	0.002357	0.926575	0.278145	null
GO:0071684	organism emergence from protective structure	3.04844	0.003704	0.914289	0	null
GO:0071801	regulation of podosome assembly	2.77887	0.001989	0.794897	0.579331	null
GO:0086103	G protein-coupled receptor signaling pathway involved in heart process	2.5832	0.001267	0.742978	0.644687	null
GO:0090279	regulation of calcium ion import	3.04415	0.003667	0.822199	0.107677	null
GO:1905664	regulation of calcium ion import across plasma membrane	2.52892	0.001117	0.821136	0.71736	90279
GO:0090330	regulation of platelet aggregation	3.01912	0.003461	0.779772	0.689024	null
GO:0034110	regulation of homotypic cell-cell adhesion	3.10687	0.004237	0.822861	0.7088	90330
GO:0097028	dendritic cell differentiation	3.20575	0.005322	0.932465	0.416209	null
GO:0030316	osteoclast differentiation	3.39287	0.00819	0.93048	0.767431	97028
GO:0036035	osteoclast development	2.58659	0.001277	0.88989	0.817707	97028
GO:0097062	dendritic spine maintenance	2.32838	0.000703	0.974473	0.004607	null
GO:0034331	cell junction maintenance	3.28466	0.006383	0.972096	0.824972	97062
GO:0034334	adherens junction maintenance	2.65128	0.001482	0.973705	0.854589	97062
GO:0097553	calcium ion transmembrane import into cytosol	3.88587	0.02549	0.969885	0.321798	null
GO:0097696	receptor signaling pathway via STAT	3.56502	0.012175	0.776648	0.475949	null
GO:0098657	import into cell	4.96713	0.307385	0.978606	0.160751	null
GO:0098751	bone cell development	3.09447	0.004118	0.88697	0.496308	null
GO:0099003	vesicle-mediated transport in synapse	4.05243	0.037406	0.960505	0.508138	null
GO:0099175	regulation of postsynapse organization	3.57391	0.012427	0.766868	0.501477	null
GO:1902950	regulation of dendritic spine maintenance	2.52634	0.001111	0.781743	0.751117	99175
GO:1902951	negative regulation of dendritic spine maintenance	1.97772	0.000312	0.757897	0.707071	99175
GO:1905809	negative regulation of synapse organization	2.76193	0.001913	0.748077	0.771683	99175
GO:0099504	synaptic vesicle cycle	4.03898	0.036266	0.952254	0.204032	null
GO:0036465	synaptic vesicle recycling	3.53706	0.011416	0.954907	0.928016	99504
GO:0048488	synaptic vesicle endocytosis	3.43505	0.009025	0.955418	0.915363	99504
GO:0120035	regulation of plasma membrane bounded cell projection organization	4.47512	0.099007	0.751189	0.628853	null
GO:0010975	regulation of neuron projection development	4.26621	0.061199	0.756815	0.943373	120035
GO:0010976	positive regulation of neuron projection development	3.67532	0.015696	0.688345	0.861492	120035
GO:0031346	positive regulation of cell projection organization	4.13136	0.044863	0.673781	0.923346	120035
GO:1900006	positive regulation of dendrite development	2.61384	0.001359	0.694807	0.745205	120035
GO:1902745	positive regulation of lamellipodium organization	3.36399	0.007662	0.696843	0.898189	120035
GO:2000392	regulation of lamellipodium morphogenesis	2.66932	0.001545	0.76212	0.750507	120035
GO:2000394	positive regulation of lamellipodium morphogenesis	2.4843	0.001008	0.696961	0.817514	120035
GO:1900408	negative regulation of cellular response to oxidative stress	2.04532	0.000365	0.756759	0.522464	null
GO:1900407	regulation of cellular response to oxidative stress	3.47553	0.009907	0.759802	0.903824	1900408
GO:1902883	negative regulation of response to oxidative stress	2.93551	0.002855	0.745884	0.847166	1900408
GO:1903201	regulation of oxidative stress-induced cell death	3.40381	0.008398	0.746439	0.841649	1900408
GO:1903202	negative regulation of oxidative stress-induced cell death	3.25334	0.005938	0.714277	0.964488	1900408
GO:1901099	negative regulation of signal transduction in absence of ligand	3.05843	0.00379	0.73915	0.468395	null
GO:1901888	regulation of cell junction assembly	4.08682	0.04049	0.768262	0.594331	null
GO:1901889	negative regulation of cell junction assembly	3.11694	0.004337	0.747868	0.61625	null
GO:1902065	response to L-glutamate	2.2833	0.000633	0.906943	0.661963	null
GO:1902882	regulation of response to oxidative stress	3.8273	0.022274	0.765153	0.469199	null
GO:1902959	regulation of aspartic-type endopeptidase activity involved in amyloid precursor protein catabolic process	2.67578	0.001568	0.82724	0.348865	null
GO:1902961	positive regulation of aspartic-type endopeptidase activity involved in amyloid precursor protein catabolic process	2.52244	0.001101	0.754369	0.973113	1902959
GO:1902993	positive regulation of amyloid precursor protein catabolic process	2.98498	0.0032	0.75362	0.913267	1902959
GO:1905247	positive regulation of aspartic-type peptidase activity	2.57749	0.00125	0.755232	0.978646	1902959
GO:1902991	regulation of amyloid precursor protein catabolic process	3.233	0.005666	0.835575	0.166123	null
GO:1903391	regulation of adherens junction organization	2.39445	0.000819	0.81121	0.110601	null
GO:1903392	negative regulation of adherens junction organization	2.1271	0.000441	0.777468	0.385236	null
GO:1903789	regulation of amino acid transmembrane transport	3.28217	0.006346	0.80211	0.579507	null
GO:0002036	regulation of L-glutamate import across plasma membrane	2.36922	0.000773	0.817857	0.890934	1903789
GO:0010958	regulation of amino acid import across plasma membrane	2.74273	0.00183	0.812894	0.928284	1903789
GO:0051955	regulation of amino acid transport	3.33224	0.007122	0.812307	0.958024	1903789
GO:1903959	regulation of anion transmembrane transport	3.0141	0.003422	0.811387	0.557024	null
GO:1903995	regulation of non-membrane spanning protein tyrosine kinase activity	1.98227	0.000315	0.825363	0.323916	null
GO:0042509	regulation of tyrosine phosphorylation of STAT protein	3.42078	0.008733	0.804629	0.705777	1903995
GO:0042531	positive regulation of tyrosine phosphorylation of STAT protein	3.32346	0.006979	0.727132	0.821375	1903995
GO:1903997	positive regulation of non-membrane spanning protein tyrosine kinase activity	1.6902	0.000159	0.761825	0.649247	null
GO:1904645	response to amyloid-beta	3.13322	0.004503	0.897175	0.506271	null
GO:0038166	angiotensin-activated signaling pathway	3.34694	0.007367	0.750253	0.991055	1904645
GO:0060396	growth hormone receptor signaling pathway	3.0086	0.003379	0.745888	0.988155	1904645
GO:0060397	growth hormone receptor signaling pathway via JAK-STAT	2.90956	0.002689	0.748453	0.972111	1904645
GO:0071378	cellular response to growth hormone stimulus	3.01241	0.003408	0.880886	0.721526	1904645
GO:0086098	angiotensin-activated signaling pathway involved in heart process	2.13672	0.000451	0.713078	0.863618	1904645
GO:1904385	cellular response to angiotensin	3.39058	0.008146	0.876728	0.772548	1904645
GO:1905232	cellular response to L-glutamate	1.27875	5.97e-05	0.903081	0.605359	null
GO:1905245	regulation of aspartic-type peptidase activity	2.72997	0.001777	0.834267	0.505864	null
GO:1905429	response to glycine	1.716	0.000169	0.911891	0.272881	null
GO:1905430	cellular response to glycine	1.07918	3.65e-05	0.904899	0.594755	null
GO:1905939	regulation of gonad development	2.81954	0.002185	0.826481	0.639545	null
GO:2000194	regulation of female gonad development	2.24304	0.000577	0.814067	0.603974	null
GO:1905941	positive regulation of gonad development	2.7348	0.001797	0.736402	0.933553	2000194
GO:2000196	positive regulation of female gonad development	1.20412	4.97e-05	0.769392	0.807547	2000194
GO:2000209	regulation of anoikis	2.97267	0.00311	0.83529	0.533608	null
GO:2000249	regulation of actin cytoskeleton reorganization	3.36342	0.007652	0.788294	0.437117	null
GO:2000251	positive regulation of actin cytoskeleton reorganization	2.87448	0.00248	0.718487	0.6083	null
GO:2000354	regulation of ovarian follicle development	2.32222	0.000693	0.83492	0.099297	null
GO:2000386	positive regulation of ovarian follicle development	1.73239	0.000176	0.772596	0.575405	null
GO:2000641	regulation of early endosome to late endosome transport	3.39777	0.008282	0.79561	0.528099	null
GO:0033008	positive regulation of mast cell activation involved in immune response	2.65801	0.001505	0.637887	0.971481	2000641
GO:0043300	regulation of leukocyte degranulation	3.15351	0.004718	0.685735	0.861042	2000641
GO:0043302	positive regulation of leukocyte degranulation	2.87216	0.002467	0.63868	0.900962	2000641
GO:0043304	regulation of mast cell degranulation	2.96755	0.003074	0.600268	0.948667	2000641
GO:0043306	positive regulation of mast cell degranulation	2.65801	0.001505	0.603041	0.954192	2000641
GO:0090313	regulation of protein targeting to membrane	3.31429	0.006833	0.802184	0.855983	2000641
GO:0090314	positive regulation of protein targeting to membrane	3.26055	0.006038	0.71842	0.95673	2000641
GO:1903305	regulation of regulated secretory pathway	3.76507	0.0193	0.789601	0.762807	2000641
GO:1903307	positive regulation of regulated secretory pathway	3.17984	0.005013	0.717975	0.851985	2000641
GO:1903533	regulation of protein targeting	3.46835	0.009745	0.799457	0.813537	2000641
GO:1903649	regulation of cytoplasmic transport	3.45637	0.009479	0.800289	0.80645	2000641
GO:2000668	regulation of dendritic cell apoptotic process	2.62325	0.001389	0.83631	0.113251	null
GO:0002902	regulation of B cell apoptotic process	2.90956	0.002689	0.831457	0.838169	2000668
GO:2000108	positive regulation of leukocyte apoptotic process	3.01115	0.003398	0.744553	0.874195	2000668
GO:2000670	positive regulation of dendritic cell apoptotic process	1.96848	0.000305	0.769344	0.761791	2000668
GO:2000811	negative regulation of anoikis	2.85552	0.002374	0.792178	0.513912	null
GO:2001240	negative regulation of extrinsic apoptotic signaling pathway in absence of ligand	3.05843	0.00379	0.722913	0.619744	null
GO:2001239	regulation of extrinsic apoptotic signaling pathway in absence of ligand	3.1682	0.004881	0.759469	0.843364	2001240
GO:2001244	positive regulation of intrinsic apoptotic signaling pathway	3.40654	0.008451	0.682324	0.769533	2001240
GO:2001286	regulation of caveolin-mediated endocytosis	2.18469	0.000504	0.772331	0.634053	null

## Sheet: Inversion_Chr2F
TermID	Name	LogSize	Frequency	Uniqueness	Dispensability	Representative
GO:0000161	osmosensory signaling MAPK cascade	1.50515	0.000103	0.811474	0.229281	null
GO:0001558	regulation of cell growth	4.34727	0.073759	0.800476	0.48966	null
GO:0001662	behavioral fear response	3.09621	0.004135	0.808581	0.628906	null
GO:0042596	fear response	3.17085	0.00491	0.832604	0.909208	1662
GO:0002191	cap-dependent translational initiation	3.22866	0.00561	0.975215	0.172958	null
GO:0002209	behavioral defense response	3.12352	0.004403	0.815144	0.672799	null
GO:0002438	acute inflammatory response to antigenic stimulus	2.49693	0.001038	0.938321	0	null
GO:0006649	phospholipid transfer to membrane	1.88649	0.000252	0.975456	0.553901	null
GO:0006939	smooth muscle contraction	3.73352	0.017947	0.844082	0.432245	null
GO:0014821	phasic smooth muscle contraction	2.91434	0.002719	0.852934	0.80874	6939
GO:0014831	gastro-intestinal system smooth muscle contraction	2.72917	0.001774	0.855469	0.791088	6939
GO:0014846	esophagus smooth muscle contraction	2.58659	0.001277	0.857369	0.778005	6939
GO:0030432	peristalsis	2.65225	0.001485	0.8565	0.783977	6939
GO:0007187	G protein-coupled receptor signaling pathway, coupled to cyclic nucleotide second messenger	3.00988	0.003389	0.792096	0.217493	null
GO:0007188	adenylate cyclase-modulating G protein-coupled receptor signaling pathway	4.29844	0.065914	0.761225	0.49774	null
GO:0007193	adenylate cyclase-inhibiting G protein-coupled receptor signaling pathway	3.70851	0.016943	0.764047	0.512655	null
GO:0007189	adenylate cyclase-activating G protein-coupled receptor signaling pathway	3.90509	0.026644	0.759075	0.865554	7193
GO:0007191	adenylate cyclase-activating dopamine receptor signaling pathway	2.59218	0.001293	0.744179	0.734215	7193
GO:0007194	negative regulation of adenylate cyclase activity	3.38489	0.00804	0.817061	0.33216	null
GO:0031280	negative regulation of cyclase activity	3.49471	0.010355	0.819507	0.892962	7194
GO:0051350	negative regulation of lyase activity	3.50759	0.010666	0.819251	0.895394	7194
GO:0008628	hormone-mediated apoptotic signaling pathway	1.5563	0.000116	0.801451	0.308868	null
GO:0010743	regulation of macrophage derived foam cell differentiation	2.99167	0.003249	0.829759	0.496499	null
GO:0010745	negative regulation of macrophage derived foam cell differentiation	2.56585	0.001217	0.796959	0.542209	null
GO:0010799	regulation of peptidyl-threonine phosphorylation	3.24748	0.005859	0.822607	0.348589	null
GO:0010801	negative regulation of peptidyl-threonine phosphorylation	2.80482	0.002112	0.79125	0.567295	null
GO:0010874	regulation of cholesterol efflux	3.19005	0.005133	0.759106	0.489818	null
GO:0010875	positive regulation of cholesterol efflux	3.01326	0.003415	0.717202	0.931142	10874
GO:1902994	regulation of phospholipid efflux	2.20952	0.000534	0.778569	0.894418	10874
GO:1902995	positive regulation of phospholipid efflux	2.20952	0.000534	0.735712	0.789417	10874
GO:0010885	regulation of cholesterol storage	2.81425	0.002158	0.781316	0.120172	null
GO:0010887	negative regulation of cholesterol storage	2.48996	0.001021	0.749638	0.855734	10885
GO:0014059	regulation of dopamine secretion	3.10209	0.004191	0.748562	0.51897	null
GO:0033603	positive regulation of dopamine secretion	1.8921	0.000255	0.731984	0.860079	14059
GO:0016115	terpenoid catabolic process	3.15473	0.004731	0.993601	0	null
GO:0018272	protein-pyridoxal-5-phosphate linkage via peptidyl-N6-pyridoxal phosphate-L-lysine	1.716	0.000169	0.984874	0.171396	null
GO:0018352	protein-pyridoxal-5-phosphate linkage	2.03342	0.000355	0.984454	0.171131	null
GO:0019264	glycine biosynthetic process from serine	4.22087	0.055132	0.974558	0.196234	null
GO:0030166	proteoglycan biosynthetic process	4.05192	0.037363	0.970276	0.297976	null
GO:0030202	heparin metabolic process	3.56502	0.012175	0.975284	0.254136	null
GO:0031635	adenylate cyclase-inhibiting opioid receptor signaling pathway	1.76343	0.000189	0.804601	0.669629	null
GO:0032276	regulation of gonadotropin secretion	2.50106	0.001048	0.637425	0.64388	null
GO:0032277	negative regulation of gonadotropin secretion	2.24551	0.00058	0.62179	0.92587	32276
GO:0033684	regulation of luteinizing hormone secretion	1.96379	0.000302	0.651088	0.823011	32276
GO:0033685	negative regulation of luteinizing hormone secretion	1.23045	5.3e-05	0.652316	0.844323	32276
GO:0032489	regulation of Cdc42 protein signal transduction	2.51188	0.001074	0.818548	0.115864	null
GO:0032611	interleukin-1 beta production	2.95231	0.000379	0.883762	0.046268	null
GO:0032612	interleukin-1 production	2.0607	0.000379	0.883762	0.835189	32611
GO:0033135	regulation of peptidyl-serine phosphorylation	3.71725	0.017287	0.813702	0.632084	null
GO:0033138	positive regulation of peptidyl-serine phosphorylation	3.59017	0.012901	0.762112	0.660404	null
GO:0033700	phospholipid efflux	2.68842	0.001615	0.985273	0.49557	null
GO:0034063	stress granule assembly	3.3694	0.007758	0.985584	0.363962	null
GO:0035809	regulation of urine volume	2.75891	0.0019	0.704786	0.474814	null
GO:0001977	renal system process involved in regulation of blood volume	2.50786	0.001064	0.700487	0.790571	35809
GO:0003093	regulation of glomerular filtration	2.45788	0.000948	0.623085	0.934599	35809
GO:0003105	negative regulation of glomerular filtration	1.51851	0.000106	0.627939	0.853391	35809
GO:0035810	positive regulation of urine volume	2.45939	0.000952	0.710711	0.907565	35809
GO:0035811	negative regulation of urine volume	2.10037	0.000414	0.719733	0.758522	35809
GO:0035860	glial cell-derived neurotrophic factor receptor signaling pathway	2.74974	0.00186	0.817565	0.146419	null
GO:0038003	G protein-coupled opioid receptor signaling pathway	3.41229	0.008564	0.78331	0.417462	null
GO:0038169	somatostatin receptor signaling pathway	3.50024	0.010487	0.781294	0.442917	null
GO:0038170	somatostatin signaling pathway	3.50024	0.010487	0.742474	0.53831	null
GO:0042273	ribosomal large subunit biogenesis	4.71609	0.172441	0.986015	0.266038	null
GO:0042320	regulation of circadian sleep/wake cycle, REM sleep	1.82607	0.000219	0.759724	0.107108	null
GO:0010840	regulation of circadian sleep/wake cycle, wakefulness	1.8451	0.000229	0.75947	0.743123	42320
GO:0010841	positive regulation of circadian sleep/wake cycle, wakefulness	1.78533	0.000199	0.726614	0.739152	42320
GO:0042749	regulation of circadian sleep/wake cycle	3.28058	0.006323	0.732656	0.870508	42320
GO:0045187	regulation of circadian sleep/wake cycle, sleep	3.24822	0.005869	0.727073	0.850648	42320
GO:0045938	positive regulation of circadian sleep/wake cycle, sleep	2.3784	0.000789	0.712201	0.899652	42320
GO:0042711	maternal behavior	2.51455	0.001081	0.858992	0.558875	null
GO:0060746	parental behavior	2.56229	0.001207	0.858381	0.818154	42711
GO:0042752	regulation of circadian rhythm	3.99577	0.032831	0.847869	0	null
GO:0042984	regulation of amyloid precursor protein biosynthetic process	2.65418	0.001492	0.834015	0.17164	null
GO:0042985	negative regulation of amyloid precursor protein biosynthetic process	2.31806	0.000686	0.801454	0.863272	42984
GO:0043587	tongue morphogenesis	2.65225	0.001485	0.987181	0	null
GO:0043691	reverse cholesterol transport	3.02694	0.003524	0.986645	0	null
GO:0043951	negative regulation of cAMP-mediated signaling	2.6561	0.001499	0.780361	0.461996	null
GO:0043950	positive regulation of cAMP-mediated signaling	2.50786	0.001064	0.762606	0.935303	43951
GO:0044060	regulation of endocrine process	3.15866	0.004774	0.74839	0.445278	null
GO:1903524	positive regulation of blood circulation	3.29026	0.006465	0.704438	0.703675	44060
GO:0044524	protein sulfhydration	1.69897	0.000162	0.984896	0.02499	null
GO:0045019	negative regulation of nitric oxide biosynthetic process	2.58771	0.00128	0.807005	0.172442	null
GO:1904406	negative regulation of nitric oxide metabolic process	2.58771	0.00128	0.816039	0.833929	45019
GO:0045329	carnitine biosynthetic process	3.36342	0.007652	0.981389	0.072829	null
GO:0045777	positive regulation of blood pressure	2.8739	0.002477	0.712211	0.481361	null
GO:0003073	regulation of systemic arterial blood pressure	3.57322	0.012407	0.692021	0.80132	45777
GO:0046005	positive regulation of circadian sleep/wake cycle, REM sleep	1	2.98e-05	0.744175	0.694491	null
GO:0046048	UDP metabolic process	2.78604	0.002023	0.980165	0.082579	null
GO:0048134	germ-line cyst formation	2.31175	0.000676	0.876639	0.560282	null
GO:0048136	male germ-line cyst formation	1.11394	3.98e-05	0.888913	0.285205	null
GO:0048137	spermatocyte division	2.26007	0.0006	0.877597	0.508315	null
GO:0048149	behavioral response to ethanol	2.86392	0.00242	0.786137	0.653372	null
GO:0051179	localization	6.74652	18.4962	1	0	null
GO:0051481	negative regulation of cytosolic calcium ion concentration	2.57634	0.001247	0.81475	0.110071	null
GO:0051482	positive regulation of cytosolic calcium ion concentration involved in phospholipase C-activating G protein-coupled signaling pathway	2.95904	0.003014	0.735065	0.396402	null
GO:0055091	phospholipid homeostasis	3.01703	0.003445	1	0	null
GO:0060125	negative regulation of growth hormone secretion	1.89763	0.000259	0.694809	0.656957	null
GO:0060147	regulation of post-transcriptional gene silencing	3.51706	0.010902	0.845498	0.20126	null
GO:0060155	platelet dense granule organization	3.27138	0.00619	0.987002	0.004355	null
GO:0060453	regulation of gastric acid secretion	2.15836	0.000474	0.707101	0.620892	null
GO:0046877	regulation of saliva secretion	2.43297	0.000895	0.657311	0.837401	60453
GO:0060454	positive regulation of gastric acid secretion	0.954243	2.65e-05	0.706707	0.729861	60453
GO:0060631	regulation of meiosis I	2.39794	0.000826	0.831618	0.374678	null
GO:0060903	positive regulation of meiosis I	2.15534	0.000471	0.787235	0.809238	60631
GO:0060964	regulation of miRNA-mediated gene silencing	3.29203	0.006492	0.829949	0.195704	null
GO:0060148	positive regulation of post-transcriptional gene silencing	2.98453	0.003196	0.786755	0.912606	60964
GO:2000637	positive regulation of miRNA-mediated gene silencing	2.93399	0.002845	0.787323	0.944152	60964
GO:0060966	regulation of gene silencing by RNA	3.51268	0.010792	0.845571	0.131446	null
GO:0061356	regulation of Wnt protein secretion	2.36549	0.000766	0.747334	0.628062	null
GO:0061358	negative regulation of Wnt protein secretion	1.73239	0.000176	0.735661	0.588434	null
GO:0071266	de novo' L-methionine biosynthetic process	4.21632	0.054558	0.969586	0.496977	null
GO:0071315	cellular response to morphine	2.21748	0.000544	0.885759	0.515733	null
GO:0048148	behavioral response to cocaine	2.72099	0.001741	0.774611	0.818955	71315
GO:0071317	cellular response to isoquinoline alkaloid	2.22531	0.000554	0.885681	0.900387	71315
GO:0090107	regulation of high-density lipoprotein particle assembly	2.13354	0.000448	0.755255	0.492328	null
GO:0106070	regulation of adenylate cyclase-activating G protein-coupled receptor signaling pathway	2.76118	0.00191	0.807563	0.406933	null
GO:0045744	negative regulation of G protein-coupled receptor signaling pathway	3.34203	0.007284	0.766179	0.779635	106070
GO:0106072	negative regulation of adenylate cyclase-activating G protein-coupled receptor signaling pathway	2.57634	0.001247	0.782663	0.717525	106070
GO:1901386	negative regulation of voltage-gated calcium channel activity	3.34967	0.007414	0.69409	0.658019	null
GO:1903937	response to acrylamide	0.90309	2.32e-05	0.91319	0.122426	null
GO:1904058	positive regulation of sensory perception of pain	1.93952	0.000285	0.738687	0.606994	null
GO:1904059	regulation of locomotor rhythm	2.24797	0.000584	0.756946	0.673672	null
GO:0042753	positive regulation of circadian rhythm	3.27508	0.006243	0.749976	0.737949	1904059
GO:1904481	response to tetrahydrofolate	1.716	0.000169	0.906648	0.443761	null
GO:1904482	cellular response to tetrahydrofolate	1.716	0.000169	0.898578	0.412911	null
GO:1904829	regulation of aortic smooth muscle cell differentiation	1.70757	0.000166	0.834259	0.105714	null
GO:0051152	positive regulation of smooth muscle cell differentiation	2.62839	0.001406	0.776375	0.832431	1904829
GO:1904831	positive regulation of aortic smooth muscle cell differentiation	1.69897	0.000162	0.792338	0.891219	1904829
GO:1905065	positive regulation of vascular associated smooth muscle cell differentiation	2.38202	0.000796	0.779586	0.889417	1904829
GO:1905214	regulation of RNA binding	2.72181	0.001744	0.816572	0.643007	null
GO:1905535	regulation of eukaryotic translation initiation factor 4F complex assembly	1.83251	0.000222	0.841176	0.107185	null
GO:1905537	positive regulation of eukaryotic translation initiation factor 4F complex assembly	1.6902	0.000159	0.796924	0.473021	null
GO:1905606	regulation of presynapse assembly	3.64395	0.014602	0.749117	0.577338	null
GO:0099174	regulation of presynapse organization	3.66586	0.015358	0.751495	0.870008	1905606
GO:1905612	positive regulation of mRNA cap binding	1.6902	0.000159	0.818286	0.583635	null
GO:1902415	regulation of mRNA binding	2.51587	0.001084	0.805562	0.957367	1905612
GO:1902416	positive regulation of mRNA binding	2.50515	0.001058	0.804782	0.921646	1905612
GO:1905216	positive regulation of RNA binding	2.62118	0.001383	0.803692	0.968704	1905612
GO:1905610	regulation of mRNA cap binding	1.6902	0.000159	0.818286	0.856273	1905612
GO:1905696	regulation of polysome binding	2.02119	0.000345	0.828024	0.103204	null
GO:1990708	conditioned place preference	1.92942	0.000279	0.861321	0.279682	null
GO:1990823	response to leukemia inhibitory factor	3.60724	0.013418	0.897109	0.686904	null
GO:1990830	cellular response to leukemia inhibitory factor	3.60239	0.013269	0.889181	0.438306	null

## Sheet: Inversion_Chr4F
TermID	Name	LogSize	Frequency	Uniqueness	Dispensability	Representative
GO:0000912	assembly of actomyosin apparatus involved in cytokinesis	3.02077	0.003475	0.935913	0.216249	null
GO:0000915	actomyosin contractile ring assembly	2.82672	0.002221	0.905524	0.720797	912
GO:0002237	response to molecule of bacterial origin	4.05873	0.037954	0.897166	0.433509	null
GO:0002443	leukocyte mediated immunity	4.11311	0.043016	1	0	null
GO:0006568	tryptophan metabolic process	4.94611	0.292863	0.88878	0.2575	null
GO:0006586	indolalkylamine metabolic process	4.94612	0.292869	0.923558	0.993413	6568
GO:0006919	activation of cysteine-type endopeptidase activity involved in apoptotic process	3.59671	0.013097	0.896378	0.104508	null
GO:0007589	body fluid secretion	3.44778	0.009294	0.855644	0.47674	null
GO:0008365	adult chitin-based cuticle development	1.73239	0.000176	0.943237	0.275799	null
GO:0010044	response to aluminum ion	3.07151	0.003906	0.92469	0.132787	null
GO:0016180	snRNA processing	4.01586	0.034386	0.953368	0.043373	null
GO:0017000	antibiotic biosynthetic process	4.54841	0.117209	0.969508	0.019372	null
GO:0019694	alkanesulfonate metabolic process	3.4216	0.00875	0.987879	0	null
GO:0030879	mammary gland development	3.62055	0.013836	0.93236	0.421963	null
GO:0007595	lactation	2.99913	0.003306	0.801392	0.751548	30879
GO:0031346	positive regulation of cell projection organization	4.13136	0.044863	0.844894	0.474642	null
GO:0032782	bile acid secretion	2.36173	0.000759	0.930553	0.188277	null
GO:0033231	carbohydrate export	0.477121	6.63e-06	0.956774	0.08701	null
GO:0033275	actin-myosin filament sliding	2.45485	0.000942	0.961712	0.003147	null
GO:0030049	muscle filament sliding	2.26951	0.000613	0.92978	0.803425	33275
GO:0034418	urate biosynthetic process	1.91381	0.000269	0.910382	0.315755	null
GO:0034465	response to carbon monoxide	1.74819	0.000182	0.914951	0.271066	null
GO:0035791	platelet-derived growth factor receptor-beta signaling pathway	2.57287	0.001237	0.895269	0.15268	null
GO:0042554	superoxide anion generation	3.26529	0.006104	0.966225	0.038816	null
GO:0042816	vitamin B6 metabolic process	4.55794	0.119809	0.922273	0.13271	null
GO:0043215	daunorubicin transport	3.83078	0.022453	0.928946	0.275149	null
GO:1901656	glycoside transport	3.84997	0.023468	0.930498	0.715749	43215
GO:0044806	G-quadruplex DNA unwinding	2.49831	0.001041	0.945229	0.003713	null
GO:0045601	regulation of endothelial cell differentiation	3.18242	0.005043	0.870936	0.566848	null
GO:0045602	negative regulation of endothelial cell differentiation	2.55509	0.001187	0.858452	0.796977	45601
GO:0046100	hypoxanthine metabolic process	3.44326	0.009197	0.862536	0.655797	null
GO:0006145	purine nucleobase catabolic process	4.00441	0.033491	0.843612	0.717393	46100
GO:0009114	hypoxanthine catabolic process	2.11059	0.000424	0.869011	0.736533	46100
GO:0009115	xanthine catabolic process	2.13672	0.000451	0.868697	0.738732	46100
GO:0046110	xanthine metabolic process	3.29907	0.006598	0.864566	0.62987	null
GO:0046113	nucleobase catabolic process	4.21951	0.054959	0.865371	0.227231	null
GO:0046305	alkanesulfonate biosynthetic process	2.99123	0.003246	0.915904	0.109283	null
GO:0019452	L-cysteine catabolic process to taurine	0.69897	1.33e-05	0.880476	0.713995	46305
GO:0019530	taurine metabolic process	3.21643	0.005454	0.874879	0.927257	46305
GO:0042412	taurine biosynthetic process	2.99123	0.003246	0.870318	0.927257	46305
GO:0046415	urate metabolic process	3.76238	0.019181	0.900622	0.211583	null
GO:0048058	compound eye corneal lens development	1.23045	5.3e-05	0.938534	0.302629	null
GO:0048066	developmental pigmentation	3.55943	0.012019	0.979981	0	null
GO:0048072	compound eye pigmentation	1.8921	0.000255	0.979981	0.734392	48066
GO:0048855	adenohypophysis morphogenesis	2.06819	0.000385	0.923329	0.675839	null
GO:0050665	hydrogen peroxide biosynthetic process	3.055	0.00376	0.95901	0.597001	null
GO:0061092	positive regulation of phospholipid translocation	2.32015	0.00069	0.782805	0.632485	null
GO:0061091	regulation of phospholipid translocation	2.43136	0.000892	0.800085	0.923688	61092
GO:0061817	endoplasmic reticulum-plasma membrane tethering	3.64787	0.014734	0.89827	0.31278	null
GO:0051643	endoplasmic reticulum localization	3.65552	0.014996	0.898201	0.8202	61817
GO:0071217	cellular response to external biotic stimulus	1.20412	4.97e-05	0.954309	0.00328	null
GO:0097184	response to azide	1.74036	0.000179	0.92147	0.502539	null
GO:0099039	sphingolipid translocation	2.1959	0.000517	0.833499	0.285495	null
GO:0099040	ceramide translocation	1.86332	0.000239	0.838244	0.556652	null
GO:0099636	cytoplasmic streaming	0.778151	1.66e-05	0.965663	0	null
GO:0110011	regulation of basement membrane organization	2.35411	0.000746	0.859102	0.108695	null
GO:0090091	positive regulation of extracellular matrix disassembly	2.44091	0.000912	0.83717	0.821233	110011
GO:1904259	regulation of basement membrane assembly involved in embryonic body morphogenesis	2.19313	0.000514	0.823143	0.969392	110011
GO:1904261	positive regulation of basement membrane assembly involved in embryonic body morphogenesis	2.19313	0.000514	0.803141	0.875238	110011
GO:1900746	regulation of vascular endothelial growth factor signaling pathway	3.03941	0.003627	0.867243	0.361398	null
GO:1900747	negative regulation of vascular endothelial growth factor signaling pathway	2.73239	0.001787	0.856421	0.95919	1900746
GO:1902547	regulation of cellular response to vascular endothelial growth factor stimulus	3.07299	0.003919	0.885056	0.705714	1900746
GO:1902548	negative regulation of cellular response to vascular endothelial growth factor stimulus	2.79796	0.002079	0.8602	0.966096	1900746
GO:1901529	positive regulation of anion channel activity	2.11394	0.000428	0.890402	0.506016	null
GO:1901557	response to fenofibrate	1.59106	0.000126	0.911218	0.382792	null
GO:1903412	response to bile acid	2.30963	0.000673	0.90597	0.495005	null
GO:1903413	cellular response to bile acid	2.14613	0.000461	0.902435	0.521536	null
GO:1903690	negative regulation of wound healing, spreading of epidermal cells	1.99564	0.000325	0.89649	0	null
GO:1904975	response to bleomycin	2.04532	0.000365	0.903015	0.579561	null
GO:1904976	cellular response to bleomycin	1.94939	0.000292	0.899065	0.395175	null
GO:1990962	xenobiotic transport across blood-brain barrier	1.94939	0.000292	0.93311	0.098621	null
GO:1990963	establishment of blood-retinal barrier	1.63347	0.000139	0.957026	0.003415	null
GO:2001212	regulation of vasculogenesis	2.78319	0.002009	0.888498	0.114146	null
GO:2001213	negative regulation of vasculogenesis	1.74036	0.000179	0.880034	0.488163	null

## Sheet: Inversion_Chr11F
TermID	Name	LogSize	Frequency	Uniqueness	Dispensability	Representative
GO:0000022	mitotic spindle elongation	2.73878	0.001814	0.730546	0.660253	null
GO:0000132	establishment of mitotic spindle orientation	3.53643	0.011399	0.405236	0.973133	22
GO:0040001	establishment of mitotic spindle localization	3.64058	0.014489	0.453066	0.857607	22
GO:0051256	mitotic spindle midzone assembly	2.59988	0.001316	0.729034	0.926895	22
GO:0051293	establishment of spindle localization	3.69241	0.016326	0.459152	0.988167	22
GO:0051294	establishment of spindle orientation	3.56253	0.012105	0.411993	0.976408	22
GO:0090307	mitotic spindle assembly	3.62045	0.013833	0.702615	0.800221	22
GO:0000086	G2/M transition of mitotic cell cycle	3.41597	0.008637	0.876527	0.535736	null
GO:0044772	mitotic cell cycle phase transition	4.13789	0.045543	0.865983	0.900809	86
GO:0044839	cell cycle G2/M phase transition	3.44326	0.009197	0.884811	0.820509	86
GO:0000741	karyogamy	3.20736	0.005341	0.860999	0.697155	null
GO:0006998	nuclear envelope organization	3.80455	0.021137	0.848337	0.822575	741
GO:0000920	septum digestion after cytokinesis	2.53782	0.001141	0.994204	0	null
GO:0001505	regulation of neurotransmitter levels	4.34345	0.073112	0.952375	0.126775	null
GO:0001927	exocyst assembly	1.11394	3.98e-05	0.630882	0.457205	null
GO:0006582	melanin metabolic process	3.82872	0.022347	0.953501	0.035541	null
GO:0035006	melanization defense response	3.10619	0.004231	0.901938	0.733799	6582
GO:0035011	melanotic encapsulation of foreign target	2.22011	0.000547	0.908259	0.757604	6582
GO:0006836	neurotransmitter transport	4.37745	0.079067	0.868747	0.192275	null
GO:0006997	nucleus organization	4.20909	0.053656	0.860816	0.404343	null
GO:0007097	nuclear migration	3.20978	0.005371	0.612873	0.659392	null
GO:0035046	pronuclear migration	1.87506	0.000245	0.642184	0.848807	7097
GO:0007268	chemical synaptic transmission	4.78557	0.20236	0.907989	0.267206	null
GO:0007269	neurotransmitter secretion	4.07972	0.039833	0.658493	0.948567	7268
GO:0098916	anterograde trans-synaptic signaling	4.78557	0.20236	0.908057	0.996021	7268
GO:0099536	synaptic signaling	4.79891	0.20867	0.917268	0.863277	7268
GO:0099537	trans-synaptic signaling	4.79078	0.204804	0.908138	0.993935	7268
GO:0099643	signal release from synapse	4.07972	0.039833	0.784983	0.877949	7268
GO:0007338	single fertilization	4.1682	0.048835	0.975803	0	null
GO:0007349	cellularization	2.97681	0.00314	0.905928	0.376494	null
GO:0009553	embryo sac development	3.27944	0.006306	0.892212	0.41832	null
GO:0009559	embryo sac central cell differentiation	2.68034	0.001585	0.887562	0.904147	9553
GO:0009561	megagametogenesis	2.98945	0.003233	0.892696	0.852403	9553
GO:0010197	polar nucleus fusion	2.66558	0.001532	0.772408	0.934036	9553
GO:0009960	endosperm development	3.03822	0.003617	0.890981	0.554749	null
GO:0010389	regulation of G2/M transition of mitotic cell cycle	4.05215	0.037383	0.950565	0.143199	null
GO:1902749	regulation of cell cycle G2/M phase transition	4.16023	0.047947	0.949997	0.790549	10389
GO:0010457	centriole-centriole cohesion	3.10175	0.004188	0.73811	0.600032	null
GO:0051299	centrosome separation	3.16643	0.004861	0.736323	0.785068	10457
GO:0010718	positive regulation of epithelial to mesenchymal transition	3.33284	0.007132	0.960833	0.107308	null
GO:0010970	transport along microtubule	4.22199	0.055274	0.614251	0.587499	null
GO:0008088	axo-dendritic transport	3.48287	0.010076	0.643699	0.885792	10970
GO:0008090	retrograde axonal transport	2.76864	0.001943	0.662185	0.906068	10970
GO:0032253	dense core granule localization	1.95904	0.000298	0.665091	0.937623	10970
GO:0072384	organelle transport along microtubule	3.67614	0.015726	0.514758	0.910044	10970
GO:0098930	axonal transport	3.36996	0.007768	0.641618	0.87221	10970
GO:0099519	dense core granule cytoskeletal transport	1.95904	0.000298	0.60742	0.714555	10970
GO:1901950	dense core granule transport	1.95904	0.000298	0.627392	0.999997	10970
GO:1990049	retrograde neuronal dense core vesicle transport	1.36173	7.29e-05	0.572169	0.947535	10970
GO:0016081	synaptic vesicle docking	2.4014	0.000832	0.575211	0.691677	null
GO:0016080	synaptic vesicle targeting	2.13672	0.000451	0.564634	0.70413	16081
GO:0016330	second mitotic wave involved in compound eye morphogenesis	1.73239	0.000176	0.815159	0.404245	null
GO:0019882	antigen processing and presentation	3.96942	0.030898	0.938056	0.512683	null
GO:0019884	antigen processing and presentation of exogenous antigen	3.11628	0.00433	0.925022	0.562541	null
GO:0002478	antigen processing and presentation of exogenous peptide antigen	3.03743	0.003611	0.922144	0.872438	19884
GO:0002495	antigen processing and presentation of peptide antigen via MHC class II	2.8893	0.002566	0.92414	0.783764	19884
GO:0002504	antigen processing and presentation of peptide or polysaccharide antigen via MHC class II	3.45834	0.009522	0.922453	0.836992	19884
GO:0019886	antigen processing and presentation of exogenous peptide antigen via MHC class II	2.84199	0.002301	0.923345	0.961029	19884
GO:0048002	antigen processing and presentation of peptide antigen	3.5387	0.011459	0.92183	0.88142	19884
GO:0021510	spinal cord development	3.81809	0.021807	0.892425	0.503999	null
GO:0021517	ventral spinal cord development	3.63448	0.014287	0.89451	0.725828	21510
GO:0022406	membrane docking	4.16711	0.048713	0.992937	0.00502	null
GO:0030397	membrane disassembly	2.48996	0.001021	0.901093	0.500939	null
GO:0030859	polarized epithelial cell differentiation	3.00775	0.003372	0.904355	0.451553	null
GO:0031113	regulation of microtubule polymerization	3.42259	0.00877	0.918299	0.144917	null
GO:0010968	regulation of microtubule nucleation	2.94939	0.002948	0.91931	0.82222	31113
GO:0031112	positive regulation of microtubule polymerization or depolymerization	3.24699	0.005852	0.914651	0.851762	31113
GO:0031116	positive regulation of microtubule polymerization	3.10449	0.004214	0.912621	0.911012	31113
GO:0060236	regulation of mitotic spindle organization	3.73902	0.018176	0.906492	0.822747	31113
GO:0090063	positive regulation of microtubule nucleation	2.51455	0.001081	0.91745	0.854325	31113
GO:0090224	regulation of spindle organization	3.75427	0.018826	0.906336	0.859309	31113
GO:0031122	cytoplasmic microtubule organization	4.00251	0.033345	0.746819	0.674998	null
GO:0007051	spindle organization	4.43921	0.091149	0.698007	0.74697	31122
GO:0032252	secretory granule localization	2.30103	0.00066	0.665864	0.126323	null
GO:0033059	cellular pigmentation	3.7641	0.019257	0.927396	0.005287	null
GO:0032400	melanosome localization	3.40943	0.008508	0.605211	0.992777	33059
GO:0032401	establishment of melanosome localization	3.38668	0.008073	0.571693	0.977903	33059
GO:0032402	melanosome transport	3.2235	0.005544	0.578664	0.8764	33059
GO:0051875	pigment granule localization	3.42716	0.008863	0.607723	0.89939	33059
GO:0051904	pigment granule transport	3.23401	0.00568	0.578219	0.959124	33059
GO:0051905	establishment of pigment granule localization	3.40209	0.008365	0.571134	0.994656	33059
GO:0034453	microtubule anchoring	3.74437	0.018402	0.754217	0.37854	null
GO:0034454	microtubule anchoring at centrosome	3.25455	0.005955	0.763754	0.611557	null
GO:0072393	microtubule anchoring at microtubule organizing center	3.28556	0.006396	0.762975	0.887125	34454
GO:0034501	protein localization to kinetochore	3.4609	0.009579	0.785194	0.579382	null
GO:0071459	protein localization to chromosome, centromeric region	3.51068	0.010743	0.784001	0.876135	34501
GO:0034502	protein localization to chromosome	3.97927	0.031608	0.775774	0.177916	null
GO:0035010	encapsulation of foreign target	2.35218	0.000743	0.945206	0	null
GO:0035047	centrosomal and pronuclear rotation	0.90309	2.32e-05	0.914937	0.64712	null
GO:0036498	IRE1-mediated unfolded protein response	2.75664	0.00189	0.941778	0.122273	null
GO:0042147	retrograde transport, endosome to Golgi	4.40047	0.083371	0.712661	0.639444	null
GO:0042461	photoreceptor cell development	3.60108	0.013229	0.877377	0.574733	null
GO:0042051	compound eye photoreceptor development	2.72346	0.001751	0.877678	0.86621	42461
GO:0042052	rhabdomere development	2.4133	0.000855	0.782862	0.899029	42461
GO:0042462	eye photoreceptor cell development	3.44389	0.009211	0.872044	0.945134	42461
GO:0044770	cell cycle phase transition	4.15485	0.047357	0.883752	0.005599	null
GO:0046855	inositol phosphate dephosphorylation	4.54449	0.116155	0.946971	0.572404	null
GO:0043647	inositol phosphate metabolic process	4.663	0.1526	0.948085	0.827127	46855
GO:0071545	inositol phosphate catabolic process	4.54516	0.116334	0.946967	0.958264	46855
GO:0048193	Golgi vesicle transport	5.10109	0.418454	0.808279	0.601106	null
GO:0048794	swim bladder development	2.65706	0.001502	0.92003	0.309973	null
GO:0050905	neuromuscular process	3.82892	0.022357	0.93398	0.374686	null
GO:0051081	nuclear membrane disassembly	2.37658	0.000786	0.868839	0.212549	null
GO:0051231	spindle elongation	3.02036	0.003471	0.736897	0.594067	null
GO:0051255	spindle midzone assembly	2.98046	0.003166	0.731896	0.678089	null
GO:0051383	kinetochore organization	3.93166	0.028325	0.862592	0.318624	null
GO:0051601	exocyst localization	2.27875	0.000627	0.898568	0	null
GO:0051642	centrosome localization	3.20276	0.005285	0.884502	0.126025	null
GO:0051646	mitochondrion localization	3.65715	0.015053	0.643385	0.660547	null
GO:0006904	vesicle docking involved in exocytosis	3.54033	0.011502	0.600959	0.911318	51646
GO:0051648	vesicle localization	4.33443	0.07161	0.615141	0.759941	51646
GO:0051653	spindle localization	3.71096	0.017039	0.57544	0.765858	51646
GO:0051656	establishment of organelle localization	4.66838	0.1545	0.599302	0.888975	51646
GO:0090522	vesicle tethering involved in exocytosis	3.73878	0.018166	0.493389	0.920412	51646
GO:0140056	organelle localization by membrane tethering	4.15287	0.047141	0.613868	0.818159	51646
GO:0051647	nucleus localization	3.28623	0.006406	0.657226	0.56484	null
GO:0051654	establishment of mitochondrion localization	3.23654	0.005713	0.641038	0.627602	null
GO:0019896	axonal transport of mitochondrion	2.76193	0.001913	0.541038	0.95376	51654
GO:0034643	establishment of mitochondrion localization, microtubule-mediated	3.16316	0.004824	0.565334	0.981068	51654
GO:0047496	vesicle transport along microtubule	3.4188	0.008693	0.504919	0.906094	51654
GO:0047497	mitochondrion transport along microtubule	3.14675	0.004645	0.528298	0.891264	51654
GO:0061339	establishment or maintenance of monopolar cell polarity	3.06221	0.003823	0.91331	0.004368	null
GO:0035088	establishment or maintenance of apical/basal cell polarity	3.36267	0.007639	0.902369	0.990101	61339
GO:0035089	establishment of apical/basal cell polarity	3.02036	0.003471	0.898038	0.982867	61339
GO:0045197	establishment or maintenance of epithelial cell apical/basal polarity	3.31281	0.00681	0.902776	0.730693	61339
GO:0045198	establishment of epithelial cell apical/basal polarity	2.91856	0.002745	0.814728	0.943292	61339
GO:0061162	establishment of monopolar cell polarity	3.0465	0.003687	0.903263	0.993484	61339
GO:0061245	establishment or maintenance of bipolar cell polarity	3.3784	0.007921	0.910418	0.758654	61339
GO:0090162	establishment of epithelial cell polarity	3.38881	0.008113	0.90482	0.765695	61339
GO:0061670	evoked neurotransmitter secretion	1.8451	0.000229	0.730403	0.645134	null
GO:0061744	motor behavior	2.93752	0.002868	0.939996	0	null
GO:0061842	microtubule organizing center localization	3.21801	0.005474	0.884299	0.139918	null
GO:0070050	neuron cellular homeostasis	3.38952	0.008127	0.993604	0.004114	null
GO:0080186	developmental vegetative growth	2.33244	0.00071	0.932834	0	null
GO:0097479	synaptic vesicle localization	3.31534	0.00685	0.630641	0.672618	null
GO:0048489	synaptic vesicle transport	3.24773	0.005862	0.587351	0.963617	97479
GO:0048491	retrograde synaptic vesicle transport	1.20412	4.97e-05	0.585153	0.777314	97479
GO:0051650	establishment of vesicle localization	4.32329	0.069796	0.546948	0.858626	97479
GO:0097480	establishment of synaptic vesicle localization	3.05269	0.003886	0.594687	0.733022	97479
GO:0099022	vesicle tethering	3.89398	0.025971	0.497842	0.932342	97479
GO:0099514	synaptic vesicle cytoskeletal transport	2.84386	0.002311	0.582738	0.920558	97479
GO:0099517	synaptic vesicle transport along microtubule	2.84386	0.002311	0.525244	0.920558	97479
GO:0099518	vesicle cytoskeletal trafficking	3.60195	0.013256	0.563378	0.893625	97479
GO:0097711	ciliary basal body-plasma membrane docking	1.77815	0.000196	0.616438	0.58783	null
GO:0098876	vesicle-mediated transport to the plasma membrane	4.3296	0.070818	0.745649	0.631247	null
GO:0006888	endoplasmic reticulum to Golgi vesicle-mediated transport	4.82845	0.223358	0.704132	0.771078	98876
GO:0006893	Golgi to plasma membrane transport	3.9874	0.032204	0.753846	0.706187	98876
GO:0099003	vesicle-mediated transport in synapse	4.05243	0.037406	0.833259	0.182865	null
GO:0099111	microtubule-based transport	4.26465	0.06098	0.870686	0.159795	null
GO:0099558	maintenance of synapse structure	2.97864	0.003153	0.896972	0.004325	null
GO:0007528	neuromuscular junction development	3.41296	0.008577	0.892155	0.752149	99558
GO:0106027	neuron projection organization	3.15137	0.004695	0.890613	0.231236	null
GO:1901615	organic hydroxy compound metabolic process	5.57102	1.23476	0.996599	0	null
GO:1903964	monounsaturated fatty acid metabolic process	1.74036	0.000179	0.984759	0.025809	null
GO:1903966	monounsaturated fatty acid biosynthetic process	1.53148	0.000109	0.985042	0.21906	null
GO:1904398	positive regulation of neuromuscular junction development	2.56229	0.001207	0.921789	0.450153	null
GO:1905515	non-motile cilium assembly	3.78554	0.020232	0.848701	0.58749	null
GO:1990535	neuron projection maintenance	2.62221	0.001386	0.896502	0.513033	null
GO:2000535	regulation of entry of bacterium into host cell	2.50106	0.001048	0.977603	0	null

## Sheet: Biogeography_Chr3
TermID	Name	LogSize	Frequency	Uniqueness	Dispensability	Representative
GO:0001964	startle response	3.02119	0.003489	0.724474	0.522723	null
GO:0003008	system process	5.40542	0.845987	0.807943	0.627783	null
GO:0007600	sensory perception	5.24273	0.581673	0.769804	0.736902	3008
GO:0050877	nervous system process	5.33444	0.718428	0.771729	0.93863	3008
GO:0050906	detection of stimulus involved in sensory perception	5.09911	0.417881	0.641421	0.92245	3008
GO:0050954	sensory perception of mechanical stimulus	4.08518	0.040466	0.800533	0.756265	3008
GO:0006491	N-glycan processing	3.14082	0.004597	0.887721	0.343442	null
GO:0006807	nitrogen compound metabolic process	7.16681	48.8376	0.928198	0.148745	null
GO:0006810	transport	6.74364	18.4324	0.831912	0.569891	null
GO:0051234	establishment of localization	6.74655	18.5567	0.833168	0.804398	6810
GO:0055085	transmembrane transport	6.60953	13.5355	0.836285	0.743328	6810
GO:0006811	monoatomic ion transport	6.12169	4.40191	0.864833	0.424987	null
GO:0006812	monoatomic cation transport	6.01529	3.44533	0.813151	0.386532	null
GO:0030001	metal ion transport	5.79642	2.08143	0.819327	0.824736	6812
GO:0034220	monoatomic ion transmembrane transport	6.04713	3.70749	0.803765	0.896194	6812
GO:0098655	monoatomic cation transmembrane transport	5.94402	2.92389	0.804533	0.878429	6812
GO:0006816	calcium ion transport	4.9555	0.300224	0.850387	0.650714	null
GO:0007610	behavior	4.49395	0.103724	0.831946	0	null
GO:0008150	biological_process	7.47805	100	1	0	null
GO:0008152	metabolic process	7.29334	65.3565	1	0	null
GO:0009058	biosynthetic process	6.92889	28.2384	0.941615	0.110142	null
GO:0009059	macromolecule biosynthetic process	6.66156	15.2584	0.8524	0.551442	null
GO:0009100	glycoprotein metabolic process	5.31548	0.687741	0.868821	0.207616	null
GO:0009581	detection of external stimulus	4.30876	0.067714	0.784084	0.597386	null
GO:0009605	response to external stimulus	5.766	1.94065	0.858473	0.358048	null
GO:0009612	response to mechanical stimulus	3.84242	0.023137	0.78845	0.551615	null
GO:0009628	response to abiotic stimulus	5.21773	0.549129	0.871957	0.3125	null
GO:0009987	cellular process	7.37637	79.1252	1	0	null
GO:0010996	response to auditory stimulus	2.98588	0.003216	0.768592	0.553106	null
GO:0007638	mechanosensory behavior	2.78104	0.002006	0.684617	0.791014	10996
GO:0050976	detection of mechanical stimulus involved in sensory perception of touch	2.24797	0.000585	0.656897	0.747515	10996
GO:0019538	protein metabolic process	6.74929	18.6739	0.873246	0.3029	null
GO:0032501	multicellular organismal process	5.8523	2.36724	1	0	null
GO:0036211	protein modification process	6.40319	8.41656	0.850577	0.525649	null
GO:0040011	locomotion	5.2403	0.578416	1	0	null
GO:0043170	macromolecule metabolic process	7.0618	38.3486	0.918583	0.17592	null
GO:0043412	macromolecule modification	6.51237	10.8223	0.910533	0.11374	null
GO:0043413	macromolecule glycosylation	5.27632	0.628442	0.881334	0.299614	null
GO:0006486	protein glycosylation	5.27626	0.628352	0.791048	0.976802	43413
GO:0006487	protein N-linked glycosylation	4.50558	0.106541	0.820734	0.83131	43413
GO:0009101	glycoprotein biosynthetic process	5.29741	0.659718	0.82129	0.98014	43413
GO:0043687	post-translational protein modification	3.93131	0.028392	0.915966	0.022404	null
GO:0044237	cellular metabolic process	7.17024	49.2253	0.921955	0.22261	null
GO:0044238	primary metabolic process	7.21096	54.0631	0.925048	0.221288	null
GO:0044249	cellular biosynthetic process	6.86525	24.3892	0.870087	0.070882	null
GO:0050896	response to stimulus	6.6446	14.674	1	0	null
GO:0050905	neuromuscular process	3.7926	0.020629	0.811173	0.493239	null
GO:0050975	sensory perception of touch	2.53529	0.001138	0.814003	0.400414	null
GO:0007605	sensory perception of sound	4.05104	0.037406	0.779172	0.810297	50975
GO:0050974	detection of mechanical stimulus involved in sensory perception	3.14582	0.00465	0.623338	0.874151	50975
GO:0051179	localization	6.75203	18.7921	1	0	null
GO:0051606	detection of stimulus	5.18702	0.511636	0.872643	0.266015	null
GO:0051716	cellular response to stimulus	6.55784	12.0168	0.830849	0.540333	null
GO:0070085	glycosylation	5.31257	0.683151	0.973237	0	null
GO:0071214	cellular response to abiotic stimulus	4.42241	0.087971	0.787283	0.671886	null
GO:0009582	detection of abiotic stimulus	4.30799	0.067595	0.770831	0.722134	71214
GO:0050982	detection of mechanical stimulus	3.31471	0.006862	0.743586	0.8761	71214
GO:0071260	cellular response to mechanical stimulus	3.344	0.007341	0.751392	0.849238	71214
GO:0071496	cellular response to external stimulus	5.02679	0.353779	0.805588	0.299918	null
GO:0071704	organic substance metabolic process	7.24837	58.927	0.922236	0.257618	null
GO:0098660	inorganic ion transmembrane transport	5.92708	2.81206	0.860575	0.471151	null
GO:0098662	inorganic cation transmembrane transport	5.84123	2.30768	0.85436	0.009047	null
GO:0070588	calcium ion transmembrane transport	4.89766	0.262782	0.836964	0.714858	98662
GO:0104004	cellular response to environmental stimulus	4.42241	0.087971	0.883846	0	null
GO:1901135	carbohydrate derivative metabolic process	6.28532	6.41605	0.949539	0.039809	null
GO:1901137	carbohydrate derivative biosynthetic process	6.1424	4.61684	0.846145	0.638155	null
GO:1901564	organonitrogen compound metabolic process	6.95509	29.9938	0.910398	0.200888	null
GO:1901566	organonitrogen compound biosynthetic process	6.6435	14.6367	0.847502	0.544558	null
GO:1901576	organic substance biosynthetic process	6.91065	27.0768	0.86238	0.667826	null

## Sheet: mito-nuclear_Chr12
TermID	Name	LogSize	Frequency	Uniqueness	Dispensability	Representative
GO:0000291	nuclear-transcribed mRNA catabolic process, exonucleolytic	3.56253	0.012144	0.598694	0.655408	null
GO:0001101	response to acid chemical	4.14919	0.046892	0.859841	0.254472	null
GO:0006139	nucleobase-containing compound metabolic process	6.85165	23.6369	0.714102	0.632677	null
GO:0006396	RNA processing	6.08608	4.05529	0.672792	0.533545	null
GO:0006397	mRNA processing	5.49177	1.03209	0.624264	0.646894	null
GO:0000375	RNA splicing, via transesterification reactions	5.19237	0.517979	0.679556	0.928773	6397
GO:0000377	RNA splicing, via transesterification reactions with bulged adenosine as nucleophile	5.19181	0.517314	0.676927	0.992612	6397
GO:0000398	mRNA splicing, via spliceosome	5.18276	0.506644	0.627343	0.868508	6397
GO:0045292	mRNA cis splicing, via spliceosome	4.19137	0.051676	0.687788	0.705213	6397
GO:0006725	cellular aromatic compound metabolic process	6.89983	26.4103	0.854782	0.270239	null
GO:0006807	nitrogen compound metabolic process	7.16681	48.8376	0.904828	0.083711	null
GO:0006950	response to stress	6.16884	4.90664	0.871677	0.515509	null
GO:0008150	biological_process	7.47805	100	1	0	null
GO:0008152	metabolic process	7.29334	65.3565	1	0	null
GO:0008380	RNA splicing	5.33528	0.719829	0.692645	0.373083	null
GO:0009056	catabolic process	6.26047	6.05918	0.943726	0.046302	null
GO:0009414	response to water deprivation	3.79886	0.020928	0.832299	0.399061	null
GO:0009415	response to water	3.85388	0.023756	0.831062	0.911162	9414
GO:0009628	response to abiotic stimulus	5.21773	0.549129	0.894569	0	null
GO:0009719	response to endogenous stimulus	5.29355	0.653877	0.893003	0.31999	null
GO:0009987	cellular process	7.37637	79.1252	1	0	null
GO:0010033	response to organic substance	5.51962	1.10044	0.823142	0.666321	null
GO:0010035	response to inorganic substance	4.91007	0.270402	0.84138	0.474265	null
GO:0010467	gene expression	6.46511	9.70637	0.855202	0.177175	null
GO:0010468	regulation of gene expression	6.5568	11.9879	0.841482	0.62336	null
GO:0060255	regulation of macromolecule metabolic process	6.58442	12.7751	0.841069	0.848224	10468
GO:0010605	negative regulation of macromolecule metabolic process	5.68293	1.60278	0.80427	0.297581	null
GO:0009892	negative regulation of metabolic process	5.70445	1.6842	0.814255	0.88058	10605
GO:0010629	negative regulation of gene expression	5.29354	0.653861	0.81862	0.876327	10605
GO:0016070	RNA metabolic process	6.60937	13.5307	0.683149	0.602379	null
GO:0016071	mRNA metabolic process	5.59415	1.30645	0.729911	0.091122	null
GO:0016072	rRNA metabolic process	5.55117	1.18335	0.700925	0.394218	null
GO:0006399	tRNA metabolic process	5.88066	2.527	0.675488	0.777473	16072
GO:0008033	tRNA processing	5.63899	1.44854	0.652093	0.797341	16072
GO:0034470	ncRNA processing	5.90624	2.6803	0.630676	0.864578	16072
GO:0019222	regulation of metabolic process	6.59301	13.0304	0.879087	0.638047	null
GO:0033993	response to lipid	4.76486	0.193554	0.822018	0.661912	null
GO:0009725	response to hormone	5.14872	0.468453	0.808311	0.768217	33993
GO:0009737	response to abscisic acid	4.19673	0.052317	0.828447	0.773602	33993
GO:0034641	cellular nitrogen compound metabolic process	6.95787	30.187	0.848421	0.284576	null
GO:0034655	nucleobase-containing compound catabolic process	5.39789	0.831439	0.637324	0.630788	null
GO:0000956	nuclear-transcribed mRNA catabolic process	4.73625	0.18121	0.518955	0.891178	34655
GO:0006401	RNA catabolic process	5.11775	0.436209	0.610881	0.884973	34655
GO:0006402	mRNA catabolic process	4.94594	0.293682	0.503883	0.852006	34655
GO:0019439	aromatic compound catabolic process	5.57208	1.24172	0.660774	0.776678	34655
GO:0044270	cellular nitrogen compound catabolic process	5.49267	1.03423	0.680007	0.739133	34655
GO:0046700	heterocycle catabolic process	5.515	1.0888	0.665063	0.761057	34655
GO:0034660	ncRNA metabolic process	6.05437	3.76976	0.694735	0.454192	null
GO:0042221	response to chemical	6.02825	3.54971	0.8755	0.391354	null
GO:0042254	ribosome biogenesis	5.69651	1.6537	0.928371	0.598748	null
GO:0006364	rRNA processing	5.54711	1.17235	0.612172	0.912851	42254
GO:0022613	ribonucleoprotein complex biogenesis	5.75119	1.87559	0.933959	0.71588	42254
GO:0043170	macromolecule metabolic process	7.0618	38.3486	0.889873	0.19244	null
GO:0043928	exonucleolytic catabolism of deadenylated mRNA	3.09968	0.004181	0.621997	0.65993	null
GO:0000288	nuclear-transcribed mRNA catabolic process, deadenylation-dependent decay	4.28796	0.064548	0.549722	0.812871	43928
GO:0044085	cellular component biogenesis	6.15899	4.79657	0.938542	0	null
GO:0044237	cellular metabolic process	7.17024	49.2253	0.901946	0.206735	null
GO:0044238	primary metabolic process	7.21096	54.0631	0.90131	0.22261	null
GO:0044248	cellular catabolic process	5.93162	2.8416	0.731118	0.014815	null
GO:0009057	macromolecule catabolic process	5.8433	2.31869	0.71555	0.719108	44248
GO:1901575	organic substance catabolic process	6.23166	5.6703	0.732644	0.819105	44248
GO:0046483	heterocycle metabolic process	6.8996	26.3963	0.8548	0.147104	null
GO:0048519	negative regulation of biological process	5.86731	2.45049	0.903824	0	null
GO:0050789	regulation of biological process	6.826	22.2818	0.872614	0.433418	null
GO:0050896	response to stimulus	6.6446	14.674	1	0	null
GO:0065007	biological regulation	6.84078	23.0527	1	0	null
GO:0071704	organic substance metabolic process	7.24837	58.927	0.898174	0.257618	null
GO:0071840	cellular component organization or biogenesis	6.45305	9.44044	0.984229	0.018111	null
GO:0090304	nucleic acid metabolic process	6.75855	19.0762	0.697848	0.367475	null
GO:0097305	response to alcohol	4.33889	0.072581	0.826936	0.652891	null
GO:1901360	organic cyclic compound metabolic process	6.91386	27.2773	0.899851	0.14619	null
GO:1901361	organic cyclic compound catabolic process	5.57755	1.25746	0.698183	0.663666	null
GO:1901700	response to oxygen-containing compound	5.23929	0.577072	0.831951	0.581823	null

[truncated: 1 more sheets: mito-nuclear_Chr14]
